LAST EDITED ON 2020-03-12 BY X.Z.

# 1 **MODELING REGULATORY NETWORK TOPOLOGY IMPROVES** 2 **GENOME-WIDE ANALYSES OF COMPLEX HUMAN TRAITS**

3 BY XIANG ZHU AND ZHANA DUREN AND WING HUNG WONG

4 *Stanford University*

5 Genome-wide association studies (GWAS) have cataloged many sig-  
6 nificant associations between genetic variants and complex traits. How-  
7 ever, most of these findings have unclear biological significance, because  
8 they often have small effects and occur in non-coding regions. Integra-  
9 tion of GWAS with gene regulatory networks addresses both issues by  
10 aggregating weak genetic signals within regulatory programs. Here we  
11 develop a Bayesian framework that integrates GWAS summary statis-  
12 tics with regulatory networks to infer enrichments and associations si-  
13 multaneously. Our method improves upon existing approaches by ex-  
14 plicitly modeling network topology to assess enrichments, and by au-  
15 tomatically leveraging enrichments to identify associations. Applying  
16 this method to 18 human traits and 38 regulatory networks shows that  
17 genetic signals of complex traits are often enriched in networks spe-  
18 cific to trait-relevant tissue or cell types. Prioritizing variants within  
19 enriched networks identifies known and new trait-associated genes re-  
20 vealing novel biological and therapeutic insights.

## 21 **INTRODUCTION**

22 Genome-wide association studies (GWAS) have catalogued many signifi-  
23 cant associations between common genetic variants, notably single-nucleotide  
24 polymorphisms (SNPs), and a full spectrum of human complex traits<sup>1,2</sup>. How-  
25 ever, it remains challenging to translate most of these findings into biological  
26 mechanisms and clinical applications. In particular, most variants have small  
27 effects<sup>3</sup> and are often mapped to non-coding regions<sup>4</sup>.

28 One possible interpretation is that non-coding variants cumulatively affect  
29 complex traits through gene regulation. To test this hypothesis, large-scale  
30 epigenomic<sup>5,6</sup> and transcriptomic<sup>7,8</sup> data have been made available span-  
31 ning diverse human cell and tissue types. Exploiting these regulatory ge-  
32 nomic data, many studies have shown enrichments of trait-associated SNPs  
33 in chromatin regions<sup>6,9,10</sup> and genes<sup>11–13</sup> that are active in trait-relevant tis-  
34 sue or cell types. These studies often incorporate regulatory information into  
35 effects of SNPs in a linear manner, and ignore potential functional interac-  
36 tions among loci within regulatory programs.

37 Gene regulatory networks<sup>14–17</sup> have proven useful in mining functional  
38 interactions of genes from genomic data. Further, context-specific regulatory

---

\*Correspondence should be addressed to X.Z. ([xiangzhu@stanford.edu](mailto:xiangzhu@stanford.edu)) and W.H.W ([whwong@stanford.edu](mailto:whwong@stanford.edu)).

39 networks are potentially informative to dissect the genetics of complex traits,  
40 since, through cellular interactions, trait-associated variants are likely to be  
41 topologically related<sup>18</sup>. Though promising, the full potential of regulatory  
42 networks is yet to be unleashed in GWAS. For example, recent connectiv-  
43 ity analyses<sup>15,19</sup> identify enrichments of genetic signals across many traits  
44 and networks, but do not leverage observed enrichments to further enhance  
45 trait-associated gene discovery<sup>14</sup>.

46 To further exploit regulatory networks in GWAS, we develop a Bayesian  
47 framework for simultaneous genome-wide enrichment and prioritization anal-  
48 ysis. Through extensive simulations on the new method, we show its flexibil-  
49 ity to various genetic architectures, its robustness to a wide range of model  
50 mis-specification, and its improved performance over existing methods. Ap-  
51 plying the method to 18 human traits and 38 regulatory networks, we identi-  
52 fy strong enrichments of genetic associations in networks that are specific  
53 to trait-relevant tissue or cell types. By prioritizing variants within the en-  
54 riched networks we identify trait-associated genes that were not implicated  
55 by the same GWAS. Many of these putatively novel genes have strong sup-  
56 port from multiple lines of external biological and clinical evidence; some are  
57 further validated by follow-up GWAS of the same traits with increased sam-  
58 ple sizes. Together, these results demonstrate the potential for our method to  
59 yield novel biological and therapeutic insights from existing GWAS.

## 60 RESULTS

61 **Method overview.** Figure 1 provides a schematic method overview. In  
62 brief, we develop a new prior distribution that dissects the total effect of a sin-  
63 gle variant on a trait into effects of multiple (nearby or distal) genes through  
64 a regulatory network, and then we combine this network-induced prior with  
65 a multiple-SNP regression likelihood based on single-SNP association sum-  
66 mary statistics<sup>20</sup> to analyze regulatory networks and complex traits jointly.  
67 We refer to this integrative framework as RSS-NET ([Methods](#)).

68 RSS-NET specifies the likelihood for SNP-level effects ( $\beta$ ) based on single-  
69 SNP effect estimates and their standard errors from GWAS (Fig. 1a), and  
70 linkage disequilibrium (LD) estimates from an external reference panel with  
71 ancestry matching the GWAS (Fig. 1b). For a given network (Fig. 1c), RSS-  
72 NET uses its topology (nodes and edges) to specify a prior that decomposes  
73 the total effect of each SNP ( $\beta$ ) into effects of multiple interconnected genes.  
74 This prior contains two independent enrichment parameters:  $\theta$  and  $\sigma^2$ , which  
75 measures the extent to which, SNPs near network nodes have increased like-  
76 lihood to be associated with the trait, and, SNPs near network edges have  
77 larger effect sizes, respectively. See [Methods](#) for mathematical definitions.

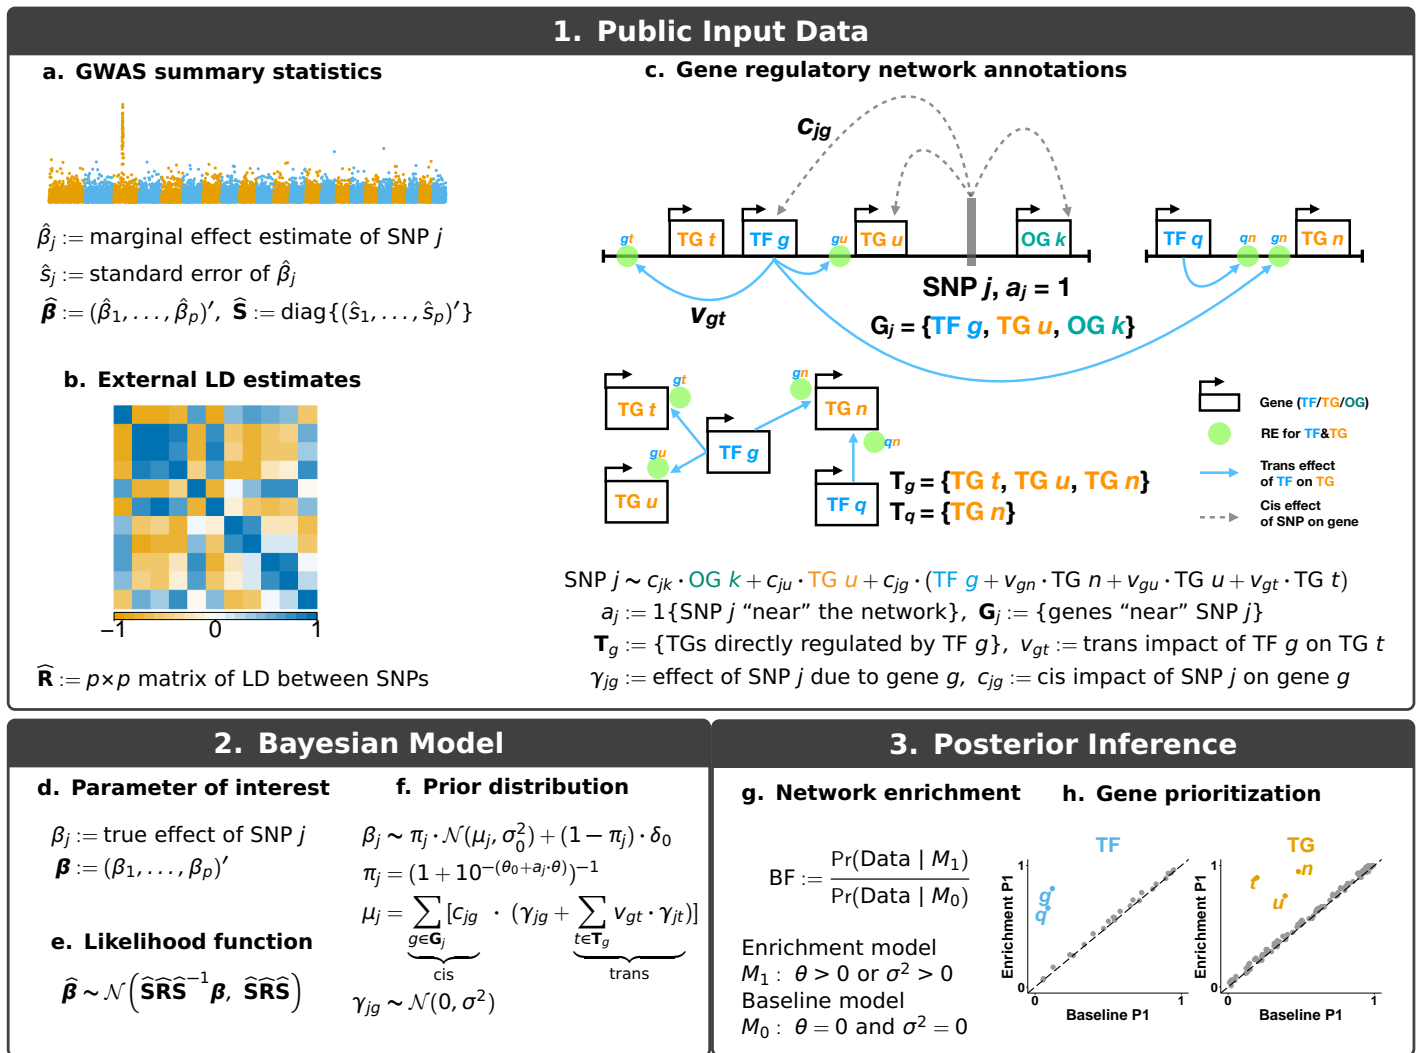

## 2. Bayesian Model

### d. Parameter of interest

$\beta_j$  := true effect of SNP  $j$   
 $\boldsymbol{\beta} := (\beta_1, \dots, \beta_p)'$

### e. Likelihood function

$\hat{\boldsymbol{\beta}} \sim \mathcal{N}(\hat{\mathbf{S}}\boldsymbol{\beta}, \hat{\mathbf{S}}^{-1})$

### f. Prior distribution

$\beta_j \sim \pi_j \cdot \mathcal{N}(\mu_j, \sigma_0^2) + (1 - \pi_j) \cdot \delta_0$   
 $\pi_j = (1 + 10^{-(\theta_0 + a_j \cdot \theta)})^{-1}$   
 $\mu_j = \underbrace{\sum_{g \in \mathbf{G}_j} [c_{jg} \cdot (\gamma_{jg} + \sum_{t \in \mathbf{T}_g} v_{gt} \cdot \gamma_{jt})]}_{\text{cis}} + \underbrace{\sum_{t \in \mathbf{T}_g} v_{gt} \cdot \gamma_{jt}}_{\text{trans}}$   
 $\gamma_{jg} \sim \mathcal{N}(0, \sigma^2)$

## 3. Posterior Inference

### g. Network enrichment

$\text{BF} := \frac{\text{Pr}(\text{Data} | M_1)}{\text{Pr}(\text{Data} | M_0)}$

Enrichment model  
 $M_1: \theta > 0$  or  $\sigma^2 > 0$   
 Baseline model  
 $M_0: \theta = 0$  and  $\sigma^2 = 0$

### h. Gene prioritization

**Fig 1: Schematic overview of RSS-NET.** RSS-NET requires three types of input data: GWAS summary statistics (a), external LD estimates (b) and gene regulatory network annotations (c). Here a regulatory network is a bipartite graph that has two types of nodes, transcription factor (TF) and target gene (TG), and has directed edges from TFs to TGs through regulatory elements (REs). RSS-NET uses a regulatory network to decompose the total effect of each SNP into effects of multiple genes. For example, the expected total effect of SNP  $j$  shown in Panel c can be represented as a sum of cis effects of three nearby genes, outside-network gene (OG)  $k$ , TG  $u$  and TF  $g$ , and trans effects of three TGs ( $n, u, t$ ) that are directly regulated by TF  $g$ . RSS-NET performs Bayesian hierarchical modeling (d-f) under two models about two enrichment parameters ( $\theta$  for nodes;  $\sigma^2$  for edges): the “baseline model” ( $M_0: \theta = 0$  and  $\sigma^2 = 0$ ) that each SNP has equal chance of being associated with the trait ( $\theta = 0$ ) and each trait-associated SNP has the same effect size distribution ( $\sigma^2 = 0$ ), and, the “enrichment model” ( $M_1: \theta > 0$  or  $\sigma^2 > 0$ ) that SNPs near network nodes are more often associated with the trait ( $\theta > 0$ ) or SNPs near network edges have larger effect sizes ( $\sigma^2 > 0$ ). To assess network enrichment, RSS-NET computes a Bayes factor (BF) comparing  $M_0$  and  $M_1$  (g). RSS-NET also automatically prioritizes loci within an enriched network by comparing the posterior distributions of genetic effects ( $\beta$ ) under  $M_0$  and  $M_1$  (h). For each locus, RSS-NET summarizes the posterior of  $\beta$  as  $P_1$ , the posterior probability that at least one SNP in this locus is associated with the trait ( $\beta_j \neq 0$ ). Differences between  $P_1$  under  $M_0$  and  $M_1$  reflect the influence of a regulatory network on genetic associations, which can highlight new trait-associated genes (h).

78 RSS-NET provides a unified framework (Fig. 1d-f) for two tasks: (1) test-  
79 ing whether a network is enriched for genetic associations; (2) identifying  
80 which genes within this network drive the enrichment. To assess network  
81 enrichment (Fig. 1g), RSS-NET computes a Bayes factor (BF) comparing the  
82 “enrichment model” ( $M_1 : \theta > 0$  or  $\sigma^2 > 0$ ) against the “baseline model” ( $M_0 :$   
83  $\theta = 0$  and  $\sigma^2 = 0$ ). To prioritize genes within enriched networks (Fig. 1h) RSS-  
84 NET contrasts posterior distributions of genetic effects ( $\beta$ ) under  $M_0$  and  $M_1$ .  
85 RSS-NET outputs results for these two tasks simultaneously.

86 RSS-NET improves upon its predecessor RSS-E<sup>13</sup>. Indeed RSS-NET in-  
87 cludes RSS-E as a special case where edge-enrichment  $\sigma^2 = 0$  and only node-  
88 enrichment  $\theta$  is learned from data. By estimating the additional parame-  
89 ter  $\sigma^2$ , RSS-NET is more flexible than RSS-E, and thus, RSS-NET consis-  
90 tently outperforms RSS-E in various simulation scenarios, and often yields  
91 better fit on real data. Despite different treatments of  $\sigma^2$ , RSS-NET and  
92 RSS-E share computation schemes (Supplementary Notes), which allows us  
93 to build RSS-NET on the efficient algorithm of RSS-E. Software is available  
94 at <https://github.com/suwonglab/rss-net>.

95 **Method comparison based on simulations.** The novelty of RSS-NET  
96 lies in its use of regulatory network topology to infer enrichments from whole-  
97 genome association statistics, and more importantly, its automatic priori-  
98 tization of loci in light of inferred enrichments. We are not aware of any  
99 published method with the same features. However, one could ignore topol-  
100 ogy and simply create SNP-level annotations based on proximity to network  
101 nodes (Supplementary Notes). On the node-based annotations, there are meth-  
102 ods to test global enrichments or local associations using GWAS summary  
103 data. Here we use Pascal<sup>21</sup>, LDSC<sup>10,22</sup> and RSS-E<sup>13</sup> to benchmark RSS-NET  
104 through genome-wide simulations on real genotypes<sup>23</sup> (Methods).

105 We started with simulations where RSS-NET modeling assumptions were  
106 satisfied. Here we considered two genetic architectures: a sparse scenario  
107 with most SNPs being null ( $\beta = 0$ ), and, a polygenic scenario with most SNPs  
108 being trait-associated ( $\beta \neq 0$ ); see Supplementary Figure 1 for details. For  
109 each architecture, we simulated baseline datasets from  $M_0$  and enrichment  
110 datasets from three patterns of  $M_1$  (only  $\theta > 0$ ; only  $\sigma^2 > 0$ ; both  $\theta > 0$  and  $\sigma^2 >$   
111  $0$ ), and used RSS-NET and existing methods to detect  $M_1$  from all datasets.  
112 Figure 2 and Supplementary Figure 1 show the trade-off between false and  
113 true enrichment discoveries for each method. Existing methods tend to per-  
114 form well in select settings. For example, Pascal and LDSC perform poorly  
115 when genetic signals are very sparse (Fig.2b) or weak (Supplementary Fig.  
116 1); RSS-E performs poorly when enrichment patterns are inconsistent with

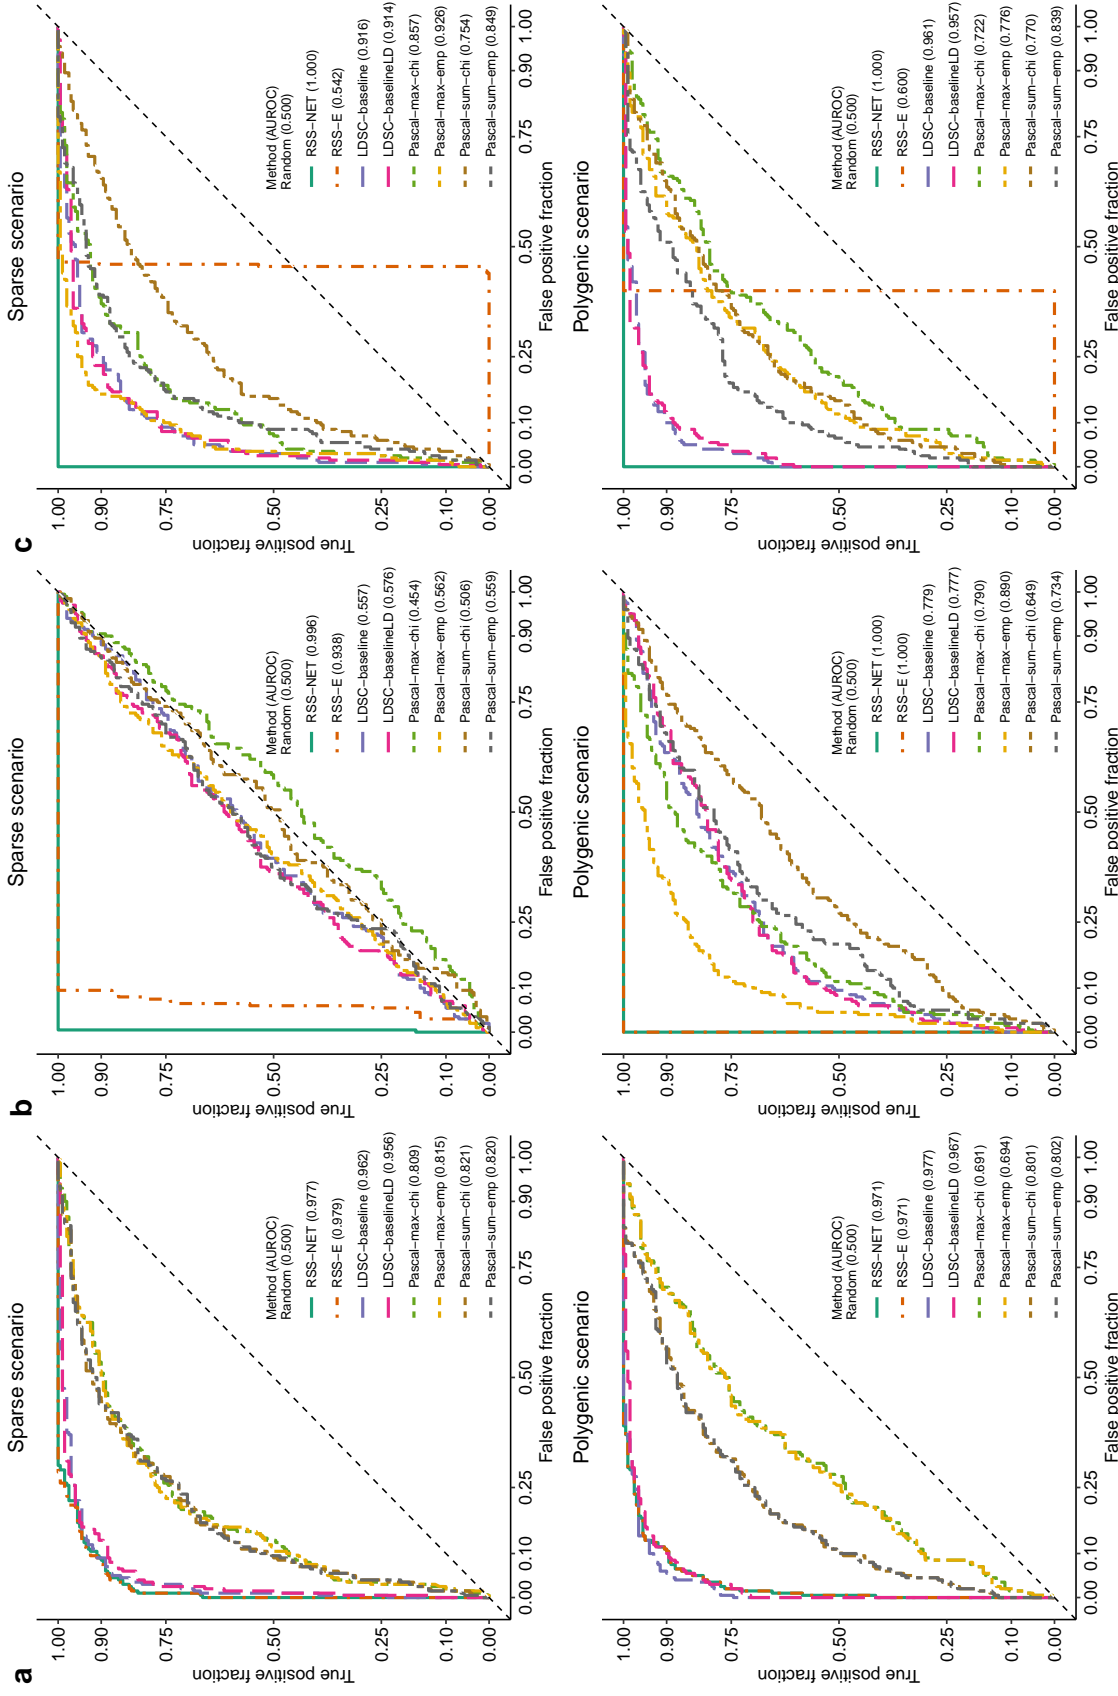

**Fig 2: Flexibility of RSS-NET to identify network-based enrichments from GWAS summary statistics.** We used real genotypes<sup>23</sup> of 348,965 genome-wide SNPs to simulate baseline and enrichment individual-level data under two genetic architectures (“sparse” and “polygenic”). The baseline data followed the baseline model ( $M_0: \theta = 0$  and  $\sigma^2 = 0$ ). The enrichment data followed the enrichment model ( $M_1: \theta > 0$  or  $\sigma^2 > 0$ ) for a target network under three scenarios: **a**  $\theta > 0, \sigma^2 = 0$ ; **b**  $\theta = 0, \sigma^2 > 0$ ; **c**  $\theta > 0, \sigma^2 > 0$ ; **d**  $\theta > 0, \sigma^2 > 0$ . We computed the corresponding single-SNP summary statistics, and, on the summary data, we compared RSS-NET with RSS-E<sup>13</sup>, LDSC-baseline<sup>10</sup>, LDSC-baselineLD<sup>22</sup> and Pascal<sup>21</sup> using their default setups. Pascal includes two gene scoring options: maximum-of- $\chi^2$  (-max) and sum-of- $\chi^2$  (-sum), and two pathway scoring options:  $\chi^2$  approximation (-chi) and empirical sampling (-emp). For each dataset, Pascal and LDSC methods produced  $p$ -values, whereas RSS-E and RSS-NET produced BF $s$ ; these statistics were used to rank the significance of enrichments. A false and true positive occurs if a method identifies enrichment of the target network in a baseline and enrichment dataset respectively. Each panel displays the trade-off between false and true enrichment discoveries, i.e. receiver operating characteristics (ROC) curves, for all methods in 200 baseline and 200 enrichment datasets of a given simulation scenario, and also reports the corresponding areas under ROC curve (AUROCs), where a higher value indicates better performance. The dashed diagonal line denotes random ROC curve, with AUROC being 0.5. Simulation details and additional results (with weaker enrichment signal) are provided in Supplementary Figure 1.

117 its modeling assumptions (Fig.2c). In contrast, RSS-NET performs consis-  
118 tently well in all scenarios. This is expected because RSS-NET models are  
119 sufficiently flexible to capture various genetic architectures and enrichment  
120 patterns. In practice, one rarely knows in advance the correct genetic or en-  
121 richment architecture. This makes the flexibility of RSS-NET appealing.

122 Genetic associations of complex traits are often enriched in regulatory re-  
123 gions<sup>5,6,10–13,22</sup>. Since a regulatory network is a set of genes linked by regula-  
124 tory elements, it is important to confirm that network enrichments identified  
125 by RSS-NET are not driven by general regulatory enrichments. Hence, we  
126 performed simulations where baseline datasets had enriched associations in  
127 random near-gene (Fig. 3a; [Supplementary Fig. 2](#)) or regulatory SNPs (Fig.  
128 3b; [Supplementary Fig. 3](#)). The results show that RSS-NET is unlikely to  
129 yield false discoveries due to arbitrary regulatory enrichments, and is yet  
130 more powerful than other methods.

131 Regulatory network edges play important roles in driving context speci-  
132 ficity<sup>16</sup> and propagating disease risk<sup>24</sup>, but existing methods largely focus  
133 on network nodes (genes). In contrast, RSS-NET leverages information from  
134 both edges and nodes. This topology-aware feature increases the potential of  
135 RSS-NET to identify the most relevant network for a trait among candidates  
136 that share many nodes but differ in edges. To illustrate this, we designed a  
137 scenario where a real target network and random candidates had the same  
138 nodes and edge counts, but different edges. We simulated enrichment and  
139 baseline datasets where genetic associations were enriched in the target net-  
140 work and random candidates respectively, and then tested enrichment of the  
141 target network on all datasets. As expected, only RSS-NET can reliably dis-  
142 tinguish true enrichments of the target network from enrichments of its edge-  
143 altered counterparts (Fig. 3c; [Supplementary Fig. 4](#)).

144 To benchmark its prioritization component, we compared RSS-NET with  
145 gene-based association methods in RSS-E<sup>13</sup> and Pascal<sup>21</sup>. Figure 4 and [Sup-  
146 plementary Figure 5](#) show the power of each method to identify genome-wide  
147 gene-level associations. Consistent with previous work<sup>13</sup>, RSS-based meth-  
148 ods substantially outperform Pascal methods even without network enrich-  
149 ment (Fig. 4a). This is because RSS-NET and RSS-E exploit a multiple regres-  
150 sion framework<sup>20</sup> to learn the genetic architecture from data of all genes and  
151 assesses their effects jointly, whereas Pascal only uses data of a single gene to  
152 estimate its effect. Similar to enrichment simulations (Fig. 2), RSS-NET out-  
153 performs RSS-E methods in prioritizing genes across different enrichment  
154 patterns (Fig. 4b-d). This again highlights the flexibility of RSS-NET.

155 Finally, since RSS-NET uses a regulatory network as is, and, most net-  
156 works to date are algorithmically inferred, we performed simulations to as-

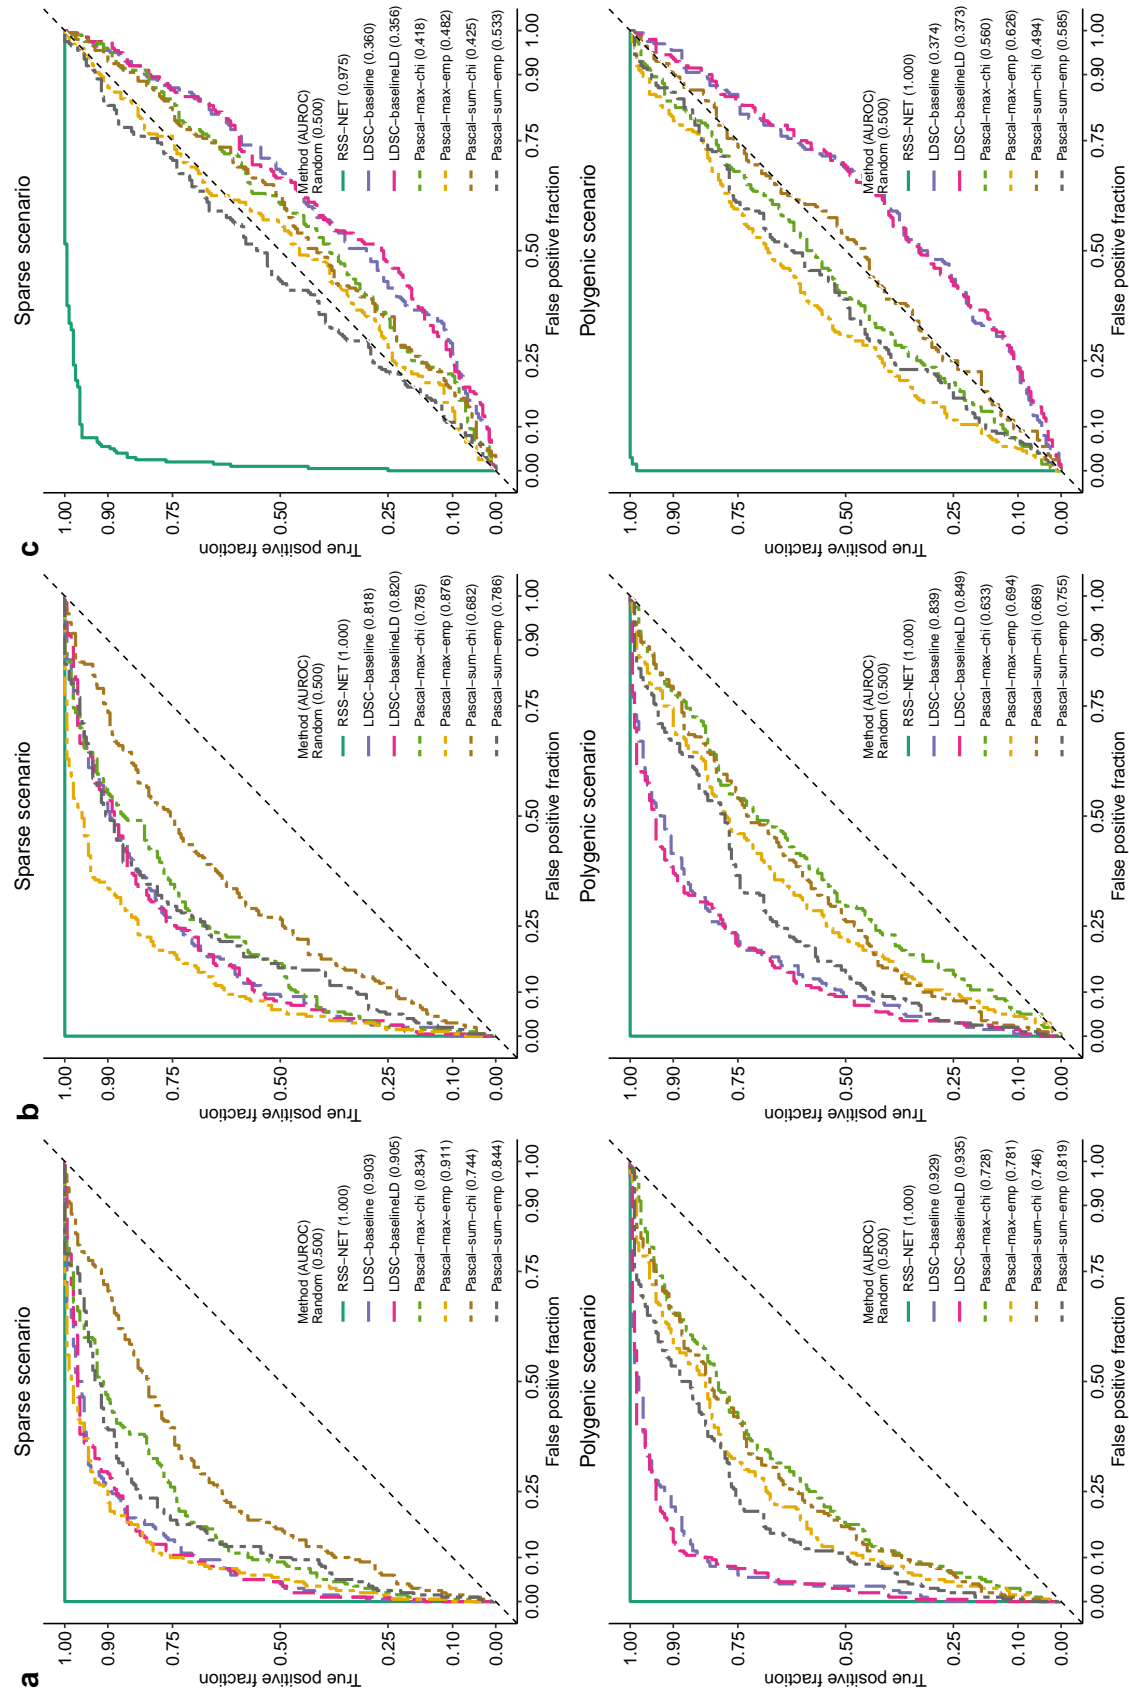

**Fig 3: Robustness of RSS-NET to model mis-specification in enrichment analysis.** Here the enrichment data were generated from a special case of  $M_1$  with  $\theta > 0$  and  $\sigma^2 > 0$ . The baseline data were simulated from three scenarios where genetic associations were enriched in: **a** a random set of near-gene SNPs; **b** a random set of near-RE SNPs; **c** a random edge-altered network. By this design,  $M_0$  was mis-specified in all three scenarios. Similar to enrichment datasets, enrichments in all baseline datasets manifested in both association proportion (more frequent) and magnitude (larger effect). RSS-E was removed from this set of simulations because of its poor performance shown in Figure 2. The rest of this simulation study is the same as Figure 2. Simulation details and additional results (with weaker enrichment signal) are provided in Supplementary Figures 2-4.

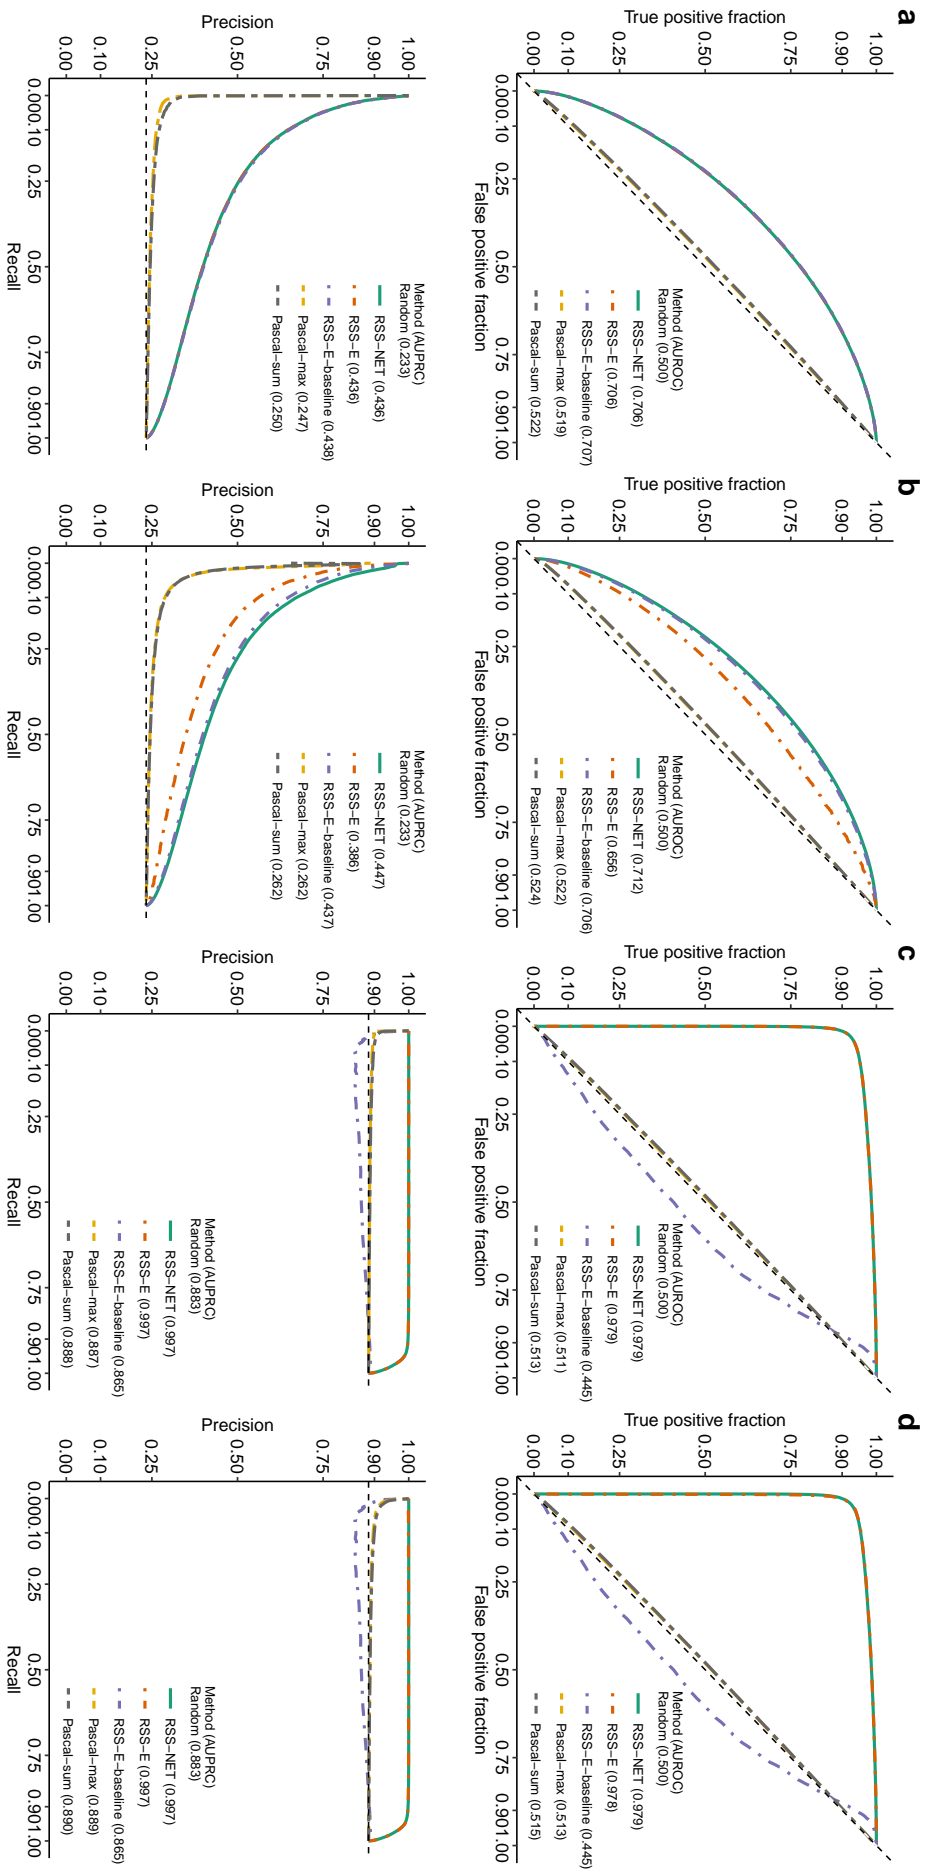

**Fig. 4: Power of RSS-NET to identify gene-based associations from GWAS summary statistics.** We used real genotypes of 348,965 genome-wide SNPs<sup>23</sup> to simulate individual-level GWAS data under four scenarios: **a**  $\theta = 0, \sigma^2 = 0$ ; **b**  $\theta = 0, \sigma^2 > 0$ ; **c**  $\theta > 0, \sigma^2 = 0$ ; **d**  $\theta > 0, \sigma^2 > 0$ . We computed the corresponding single-SNP summary statistics, and, on the summary data, we compared RSS-NET with gene-based association methods available in RSS-E<sup>13</sup> and Pascal<sup>21</sup>. RSS-E is a special case of RSS-NET assuming  $\sigma^2 = 0$ , and RSS-E-baseline is a special case of RSS-E assuming  $\theta = 0$ . Pascal includes two gene scoring options: maximum-of- $\chi^2$  (-max) and sum-of- $\chi^2$  (-sum). Each scenario contains 200 datasets, each with 16,954 autosomal protein-coding genes. For each dataset, we defined a gene as “trait-associated” if at least one SNP within 100 kb of the transcribed region of this gene had nonzero effect. For each gene in each dataset, RSS methods produced posterior probabilities that the gene was trait-associated, whereas Pascal methods produced association  $p$ -values; these statistics were used to rank the significance of gene-level associations. The upper half of each panel displays ROC curves and AUROCs for all methods, with dashed diagonal lines indicating random performance (AUROC=0.5). The lower half of each panel displays precision-recall (PRC) curves and areas under PRC curves (AUPRCs) for all methods, with dashed horizontal lines indicating random performance. For AUROC and AUPRC, higher value indicates better performance. Simulation details and additional results are provided in [Supplementary Figure 5](#).



157 sess the robustness of RSS-NET under noisy networks. Specifically we sim-  
158 ulated datasets from a real target network, created noisy networks by ran-  
159 domly removing edges from this real target, and then used the noisy net-  
160 works, rather than the real one, in RSS-NET analyses. By exploiting retained  
161 true nodes and edges, RSS-NET produces reliable results in identifying both  
162 network enrichments and genetic associations, and unsurprisingly, its perfor-  
163 mance drops as the noise level increases (Supplementary Fig. 6).

164 In conclusion, RSS-NET is flexible to perform well in various genetic ar-  
165 chitectures and enrichment patterns, is robust to a wide range of model mis-  
166 specification, and outperforms existing related methods. To further investi-  
167 gate its real-world utility, we applied RSS-NET to analyze 18 complex traits  
168 and 38 regulatory networks.

169 **Enrichment analyses of 38 networks across 18 traits.** We first in-  
170 ferred<sup>17</sup> whole-genome regulatory networks for 38 tissue or cell types, using  
171 public paired data of gene expression and chromatin accessibility (Methods;  
172 Supplementary Table 1). Clustering analysis showed that networks recapit-  
173 ulated context similarity, with immune cells and brain regions grouping to-  
174 gether as two single units (Fig. 5a; Supplementary Fig. 7).

175 On these 38 networks, we then applied RSS-NET to analyze 1.1 million  
176 common SNPs<sup>25</sup> for 18 traits, using GWAS summary statistics from 20,883  
177 to 253,288 European ancestry individuals (Supplementary Table 2). For each  
178 trait-network pair we computed a BF assessing network enrichment. Full  
179 results of 684 trait-network pairs are available online (Methods).

180 To check whether observed enrichments could be driven by general regu-  
181 latory enrichments, we created a “near-gene” control network with 18,334  
182 protein-coding autosomal genes as nodes and no edge, and then analyzed  
183 this control with RSS-NET on the same GWAS data. For most traits, the  
184 near-gene control has substantially weaker enrichment than the actual net-  
185 works. In particular, 512 out of 684 trait-network pairs (one-sided Binomial  
186  $p = 2.2 \times 10^{-40}$ ) showed stronger enrichments than their near-gene counter-  
187 parts (average log<sub>10</sub> BF increase: 13.94, one-sided  $p = 5.1 \times 10^{-15}$ ), and, 16  
188 out of 18 traits had multiple networks more enriched than the near-gene con-  
189 trol (minimum 5; one-sided Wilcoxon  $p = 1.2 \times 10^{-4}$ ; Supplementary Table 3).  
190 Consistent with simulations (Fig. 3a-b), these results indicate that network  
191 enrichments identified by RSS-NET are unlikely due to generic regulatory  
192 enrichments harbored in the vicinity of genes.

193 Among 512 trait-network pairs passing the near-gene enrichment control,  
194 we further examined whether the observed enrichments could be confounded  
195 by network properties or genomic annotations. We associated the BFs with

196 three network features and did not observe any correlation (proportion of  
197 SNPs in a network:  $r = -3.0 \times 10^{-2}$ ,  $p = 0.49$ ; node counts:  $r = -5.4 \times 10^{-2}$ ,  
198  $p = 0.23$ ; edge counts:  $r = -9.2 \times 10^{-3}$ ,  $p = 0.84$ ). To check confounding ef-  
199 fects of genomic annotations (e.g., promoter), we computed the correlation  
200 between BFs and proportions of SNPs falling into a network and each of  
201 73 functional categories<sup>10,22</sup>, and we did not find any significant correla-  
202 tion ( $-0.13 < r < -0.01$ ,  $p > 0.05/73$ ). Similar patterns hold for all 684 trait-  
203 network pairs (Supplementary Tables 4-5). Together, these results suggest  
204 that observed network enrichments are unlikely to be driven by known fea-  
205 tures and the resulting model mis-specification.

206 For each trait-network pair, we also computed BFs comparing the base-  
207 line ( $M_0$ ) against three disjoint models where enrichments were contributed  
208 by (1) only nodes ( $M_{11} : \theta > 0, \sigma^2 = 0$ ); (2) only edges ( $M_{12} : \theta = 0, \sigma^2 > 0$ );  
209 (3) both nodes and edges ( $M_{13} : \theta > 0, \sigma^2 > 0$ ). We found that  $M_{13}$  was the  
210 most supported model by data (with the largest BF) for 411 out of 512 trait-  
211 network pairs (one-sided Binomial  $p = 1.2 \times 10^{-45}$ ), corroborating the “omni-  
212 genic” hypothesis<sup>24,26</sup> that genetic signals of complex traits tend to be spread  
213 across the genome via regulatory interconnections. When stratifying results  
214 by traits, however, we observed that enrichment patterns could vary consid-  
215 erably (Fig. 5b; Supplementary Table 6). For type 2 diabetes (T2D), two of  
216 five networks passing the near-gene enrichment control showed the strongest  
217 support for node-only enrichment ( $M_{11}$ ). Many networks showed the strongest  
218 support for edge-only enrichment ( $M_{12}$ ) in breast cancer (10), body mass in-  
219 dex (BMI, 14), waist-hip ratio (37) and schizophrenia (38). Since one rarely  
220 knows the true enrichment patterns a priori, and  $M_1$  includes the restricted  
221 models ( $M_{11}$ ,  $M_{12}$ ,  $M_{13}$ ) as special cases, we used BFs based on  $M_1$  in this  
222 study. Collectively, these results highlight the heterogeneity of network en-  
223 richments across complex traits, which can be potentially learned from data  
224 by flexible approaches like RSS-NET.

225 Top-ranked enrichments recapitulated many trait-context links reported  
226 in previous GWAS. Genetic associations with BMI were enriched in the net-  
227 works of pancreas (BF =  $2.07 \times 10^{13}$ ), bowel (BF =  $8.02 \times 10^{12}$ ) and adipose  
228 (BF =  $4.73 \times 10^{12}$ ), consistent with the roles of obesity-related genes in insulin  
229 biology and energy metabolism. Networks of immune cells showed enrich-  
230 ments for rheumatoid arthritis (RA, BF =  $2.95 \times 10^{60}$ ), inflammatory bowel  
231 disease (IBD, BF =  $5.07 \times 10^{35}$ ) and Alzheimer’s disease (BF =  $8.31 \times 10^{26}$ ).  
232 Networks of cardiac and other muscle tissues showed enrichments for coro-  
233 nary artery disease (CAD, BF =  $9.78 \times 10^{28}$ ), atrial fibrillation (AF, BF =  
234  $8.55 \times 10^{14}$ ), and heart rate (BF =  $2.43 \times 10^7$ ). Other examples include brain  
235 network with neuroticism (BF =  $2.12 \times 10^{19}$ ), and, liver network with high-

236 density lipoprotein (HDL,  $\text{BF} = 2.81 \times 10^{21}$ ) and low-density lipoprotein (LDL,  
237  $\text{BF} = 7.66 \times 10^{27}$ ).

238 Some top-ranked enrichments were not identified in the original GWAS,  
239 but they are biologically relevant. For example, natural killer (NK) cell net-  
240 work showed the strongest enrichment among 38 networks for BMI ( $\text{BF} =$   
241  $3.95 \times 10^{13}$ ), LDL ( $\text{BF} = 5.18 \times 10^{30}$ ) and T2D ( $\text{BF} = 1.49 \times 10^{77}$ ). This result  
242 supports a recent mouse study<sup>27</sup> revealing the role of NK cell in obesity-  
243 induced inflammation and insulin resistance, and adds to the considerable  
244 evidence unifying metabolism and immunity in many pathological states<sup>28</sup>.  
245 Other examples include adipose network with CAD<sup>29</sup> ( $\text{BF} = 1.67 \times 10^{29}$ ), liver  
246 network with Alzheimer's disease<sup>13,30</sup> ( $\text{BF} = 1.09 \times 10^{20}$ ) and monocyte net-  
247 work with AF<sup>31,32</sup> ( $\text{BF} = 4.84 \times 10^{12}$ ).

248 Some networks show enrichments in multiple traits. To assess network  
249 co-enrichments among traits, we tested correlations for all trait pairs us-  
250 ing their BF's of 38 networks (Fig. 5c; Supplementary Table 7). Among 153  
251 trait pairs, 29 of them were significantly correlated ( $p < 0.05/153$ ). Reas-  
252 suringly, subtypes of the same disease showed strongly correlated enrich-  
253 ments, as in IBD subtypes ( $r = 0.96$ ,  $p = 1.3 \times 10^{-20}$ ) and CAD subtypes  
254 ( $r = 0.90$ ,  $p = 3.3 \times 10^{-14}$ ). The results also recapitulated known genetic cor-  
255 relations including RA with IBD<sup>33</sup> ( $r = 0.79$ ,  $p = 5.3 \times 10^{-9}$ ), and, neuroti-  
256 cism with schizophrenia<sup>34</sup> ( $r = 0.73$ ,  $p = 1.6 \times 10^{-7}$ ). Network enrichments of  
257 CAD were correlated with enrichments of its established risk factors such as  
258 heart rate<sup>35</sup> ( $r = 0.75$ ,  $p = 5.1 \times 10^{-8}$ ) and BMI<sup>36</sup> ( $r = 0.71$ ,  $p = 5.1 \times 10^{-7}$ ),  
259 and its associated traits such as AF<sup>37</sup> ( $r = 0.65$ ,  $p = 9.2 \times 10^{-6}$ ) and height<sup>38</sup>  
260 ( $r = 0.64$ ,  $p = 1.6 \times 10^{-5}$ ). Network enrichments of Alzheimer's disease were  
261 strongly correlated with enrichments of LDL ( $r = 0.90$ ,  $p = 2.6 \times 10^{-14}$ ) and  
262 IBD ( $r = 0.78$ ,  $p = 8.3 \times 10^{-9}$ ), consistent with recent data linking Alzheimer's  
263 disease to lipid metabolism<sup>39</sup> and immune activation<sup>40</sup>. The results show  
264 the potential of GWAS to highlight trait similarities via regulatory networks,  
265 complementing previous work via SNPs<sup>41</sup>, heritabilities<sup>42</sup> and pathways<sup>13</sup>.

266 **Enrichment-informed prioritization of network genes.** A key fea-  
267 ture of RSS-NET, inherited from RSS-E<sup>13</sup>, is that inferred network enrich-  
268 ments automatically contribute to prioritize genetic associations of network  
269 genes. Specifically, for each locus RSS-NET produces  $P_1^{\text{base}}$ ,  $P_1^{\text{near}}$  and  $P_1^{\text{net}}$ ,  
270 the posterior probability that at least one SNP in the locus is associated with  
271 the trait, assuming  $M_0$ ,  $M_1$  for the near-gene control network, and  $M_1$  for a  
272 given network, respectively (Method). When multiple networks are enriched,  
273 RSS-NET produces  $P_1^{\text{bma}}$  by averaging  $P_1^{\text{net}}$  over all networks passing the  
274 near-gene control, weighted by their BF's (Method). This allows us to assess

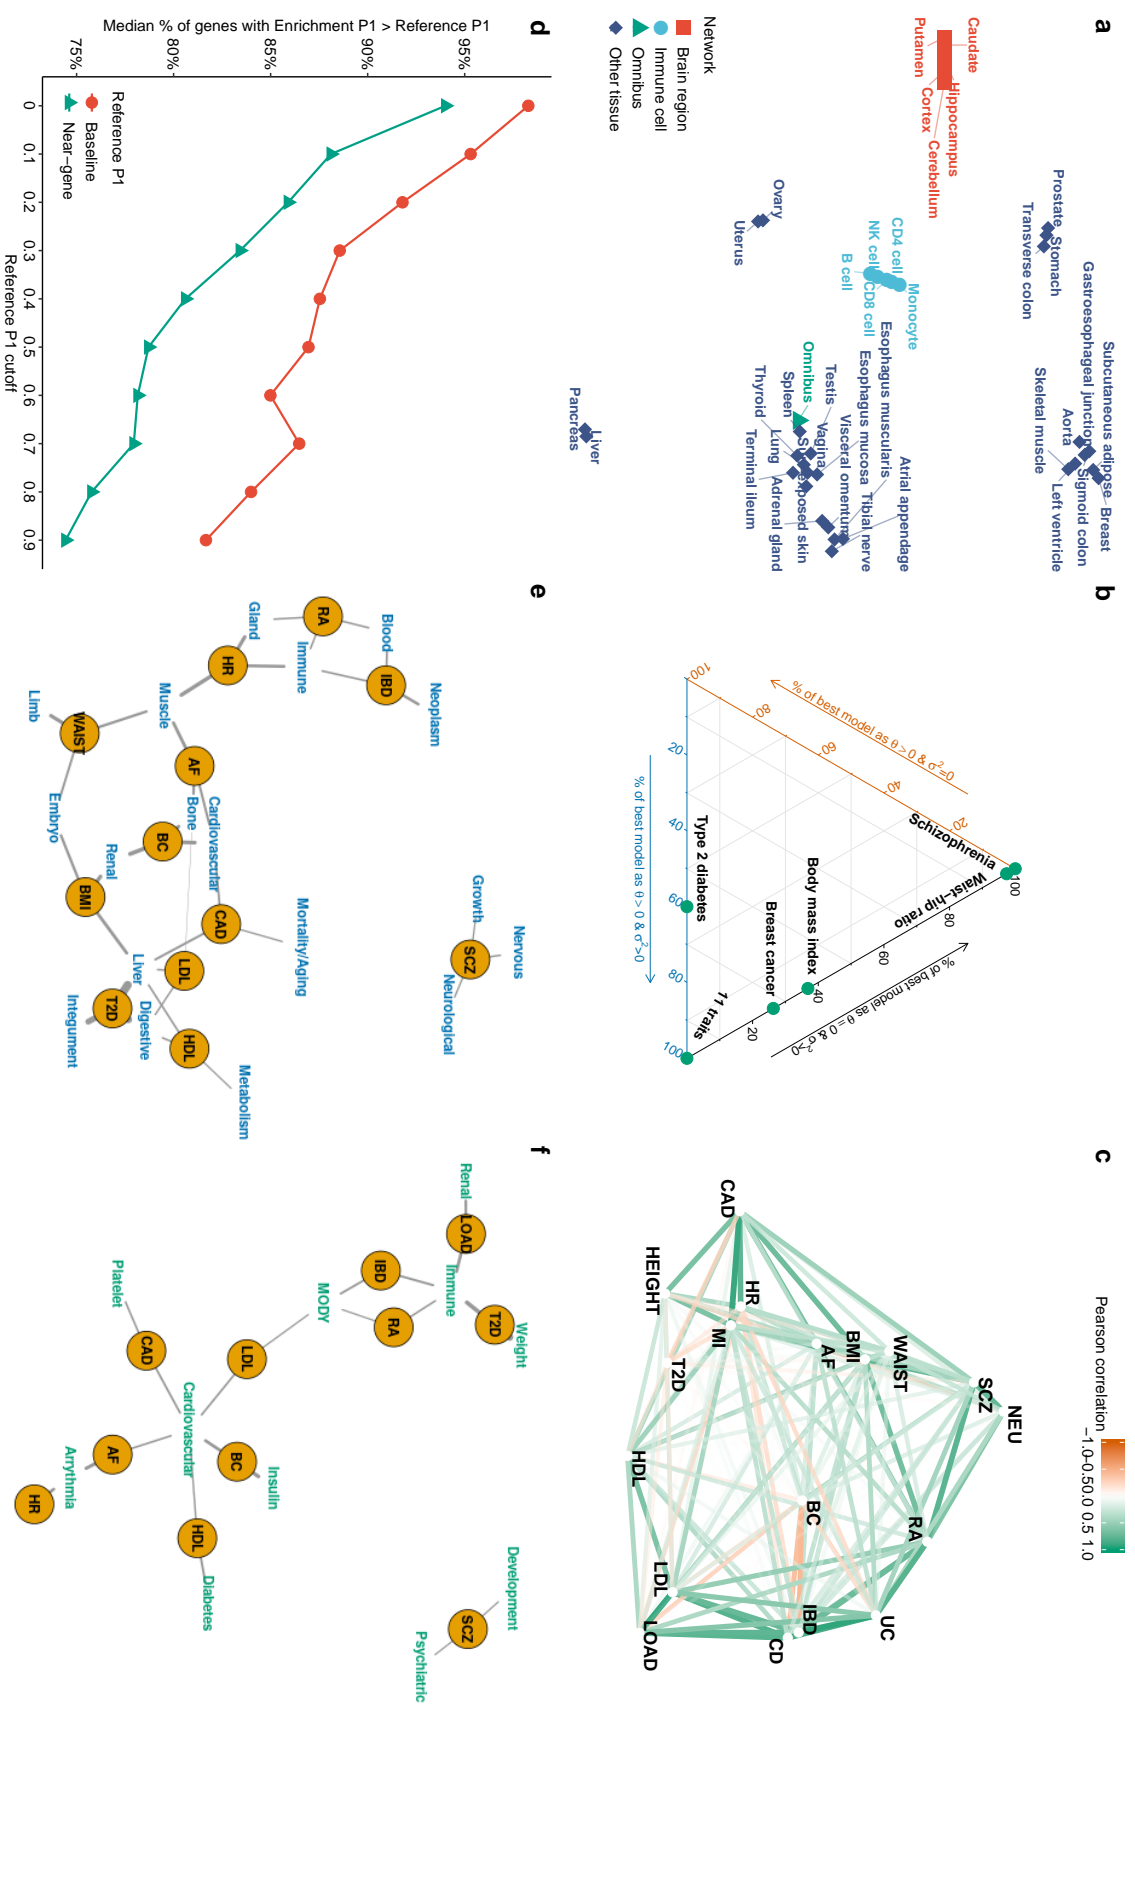

**Fig 5: RSS-NET analyses of GWAS summary statistics for 18 complex traits across 38 regulatory networks.** **a** Clustering of 38 regulatory networks based on distributed stochastic neighbour embedding. Analysis details and additional results are provided in [Supplementary Figure 7](#). **b** Ternary diagram showing, for each trait, the percentages of the “best” enrichment model (showing the largest BF) as the node-only ( $M_{11} : \theta > 0, \sigma^2 = 0$ ), edge-only ( $M_{12} : \theta = 0, \sigma^2 > 0$ ) and node-and-edge ( $M_{13} : \theta > 0, \sigma^2 > 0$ ) model across networks. See [Supplementary Table 6](#) for numerical values. Shown are 16 traits that had multiple networks more enriched than the near-gene control. **c** Network diagram of BF correlations among 18 traits across 38 networks, where traits with stronger correlations are located closer and connected by darker edges. See [Supplementary Table 6](#) for correlation estimates. **d** Median proportion of genes with  $P_{1na}$  higher than reference estimates ( $P_{1near}$ ), among genes with reference estimates higher than a given cutoff. Medians are evaluated among 16 traits that had multiple networks more enriched than the near-gene control. See [Supplementary Table 8](#) for numerical values. **e-f** Overlap of RSS-NET prioritized genes ( $P_{1na} \geq 0.9$ ) with genes implicated in knockout mouse phenotypes [43](#) (**e**) and human Mendelian diseases [44,45](#) (**f**). An edge indicates that a category of knockout mouse or Mendelian genes is significantly enriched for genes prioritized for a GWAS trait (FDR  $\leq 0.1$ ). Thicker edges correspond to stronger enrichment odds ratios. To simplify visualization, only top-ranked categories are shown for each trait (**e**: 3; **f**: 2). See [Supplementary Tables 12-13](#) for full results. Abbreviations of GWAS traits are defined in [Supplementary Table 2](#).

275 genetic associations in light of enrichment without having to select a sin-  
276 gle enriched network. Differences in estimates based on enrichment ( $P_1^{\text{net}}$  or  
277  $P_1^{\text{bma}}$ ) and reference ( $P_1^{\text{base}}$  or  $P_1^{\text{near}}$ ) reflect the enrichment impact on a locus.

278 RSS-NET enhances genetic association detection by leveraging inferred  
279 enrichments. To quantify this improvement, for each trait we calculated the  
280 proportion of genes with higher  $P_1^{\text{bma}}$  than reference estimates ( $P_1^{\text{base}}$  or  $P_1^{\text{near}}$ ),  
281 among genes with reference  $P_1$  passing a given cutoff (Fig. 5d). When using  
282  $P_1^{\text{base}}$  as reference, we observed high proportions of genes with  $P_1^{\text{bma}} > P_1^{\text{base}}$   
283 (median: 82 – 98%) across a wide range of  $P_1^{\text{base}}$ -cutoffs (0 – 0.9), and as ex-  
284 pected, the improvement decreased as the reference cutoff increased. When  
285 using  $P_1^{\text{near}}$  as reference, we observed less genes with improved  $P_1$  than using  
286  $P_1^{\text{base}}$  (one-sided Wilcoxon  $p = 9.8 \times 10^{-4}$ ), suggesting the observed improve-  
287 ment might be partially due to general near-gene enrichments, but propor-  
288 tions of genes with  $P_1^{\text{bma}} > P_1^{\text{near}}$  remained high (median: 74 – 94%) nonethe-  
289 less. Similar patterns occurred when we repeated the analysis with  $P_1^{\text{net}}$   
290 across 512 trait-network pairs (Supplementary Table 8). Together the results  
291 demonstrate the strong influence of network enrichments on nominating ad-  
292 ditional trait-associated genes.

293 RSS-NET tends to promote more genes in networks with stronger enrich-  
294 ments. For each trait the proportion of genes with  $P_1^{\text{net}} > P_1^{\text{near}}$  in a network  
295 is often positively correlated with its enrichment BF ( $r : 0.28 - 0.91$ ; Supple-  
296 mentary Table 9). When a gene belongs to multiple networks, its highest  $P_1^{\text{net}}$   
297 often occurs in the top-enriched networks. We illustrate this coherent pattern  
298 with *MT1G*, a liver-active<sup>7</sup> gene that was prioritized for HDL by RSS-NET  
299 and also implicated in a recent multi-ancestry genome-wide sleep-SNP inter-  
300 action analysis of HDL<sup>46</sup>. Although *MT1G* belongs to regulatory networks  
301 of 18 contexts, only the top enrichment in liver (BF =  $2.81 \times 10^{21}$ ) informs a  
302 strong association between *MT1G* and HDL ( $P_1^{\text{net}} = 0.98$ ), and remaining net-  
303 works with weaker enrichments yield minimal improvement ( $P_1^{\text{base}} = 0.10$ ,  
304  $P_1^{\text{net}} : 0.14 - 0.19$ ). Additional examples are shown in Figure 6.

305 RSS-NET recapitulates many genes previously implicated in the same  
306 GWAS. For each analyzed dataset we downloaded the corresponding genes  
307 from the GWAS Catalog<sup>47</sup> and computed the proportion of these genes that  
308 had high  $P_1^{\text{bma}}$ . With a stringent cutoff 0.9, we observed a significant overlap  
309 (median across traits: 69%; median Fisher exact  $p = 1.24 \times 10^{-26}$ ; Supplemen-  
310 tary Table 10). Reassuringly, many recapitulated genes are well-established  
311 for the traits (Supplementary Table 11), such as *CACNA1C* for schizophrenia,  
312 *TCF7L2* for T2D, *APOB* for lipids and *STAT4* for autoimmune diseases.

313 RSS-NET also uncovers putative associations that were not reported in  
314 the same GWAS. To demonstrate that many of these new associations are

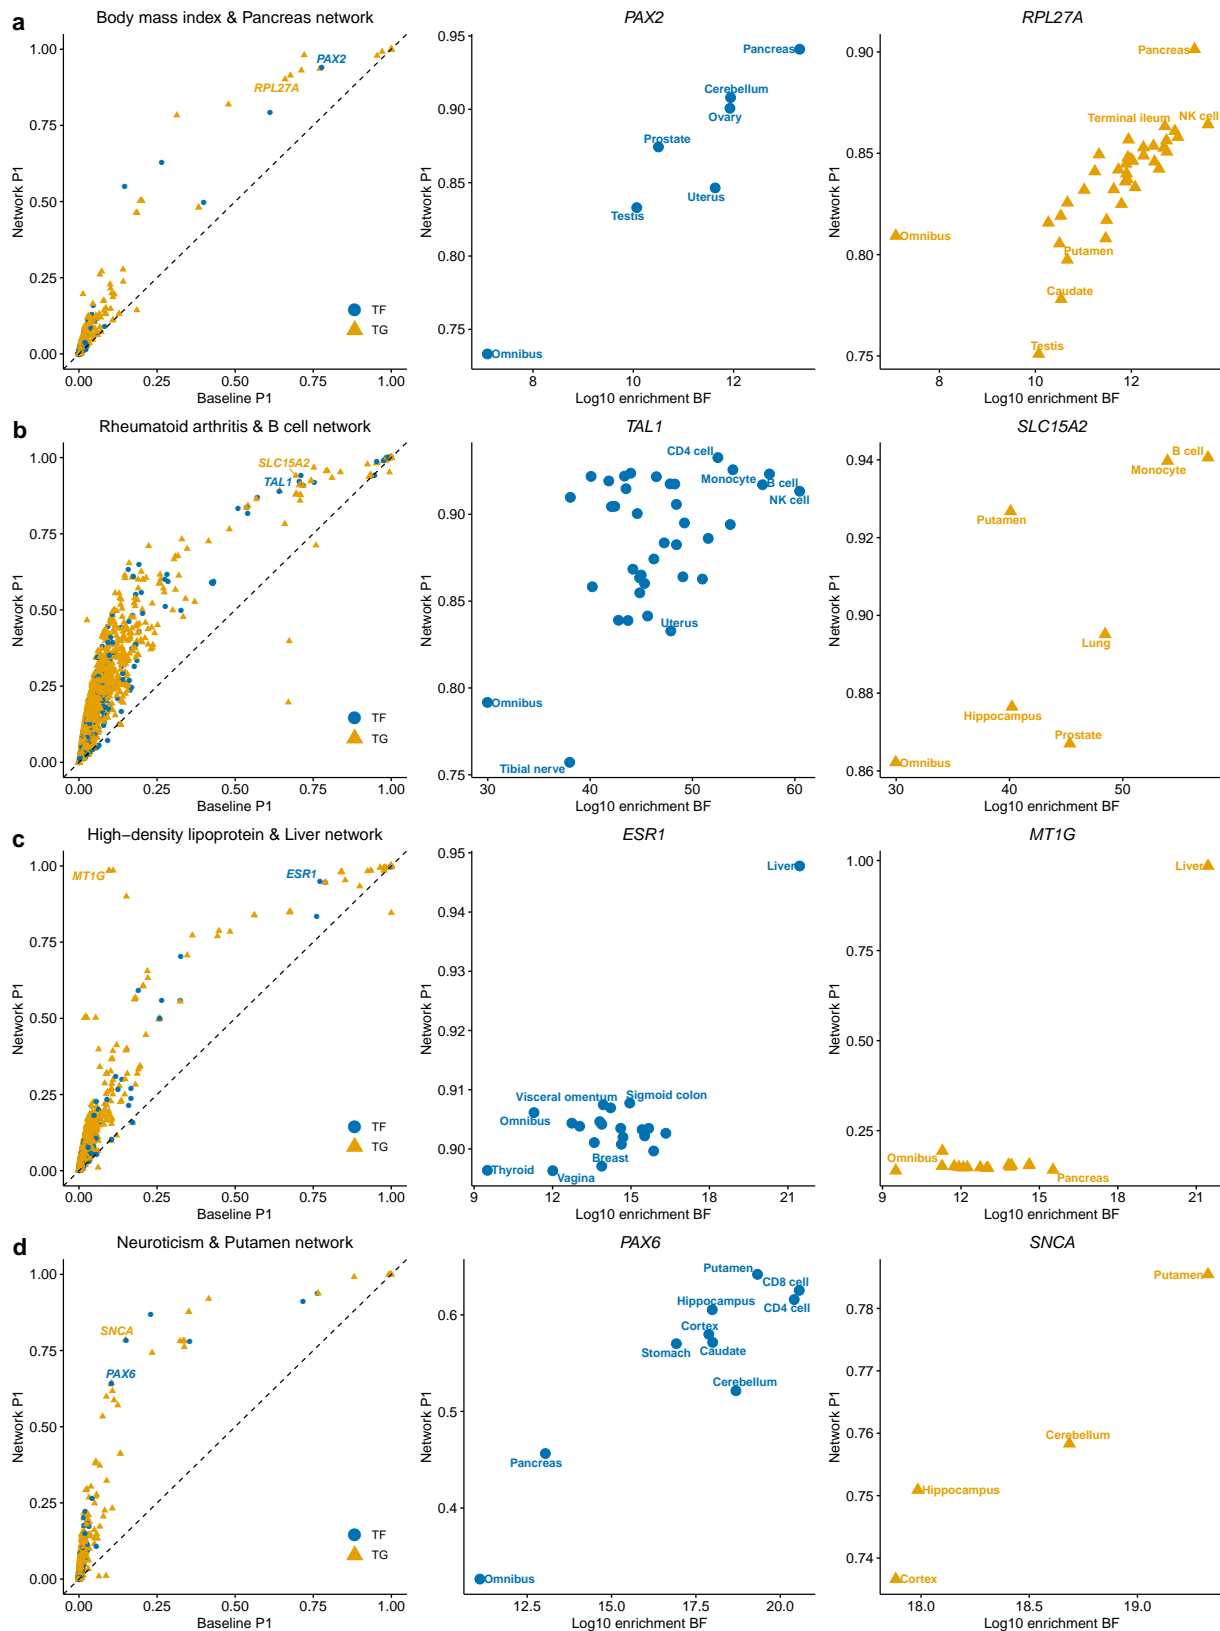

**Fig 6: RSS-NET gene prioritization results of select trait-network pairs.** In the left column, each dot represents a member gene of a given network. In the center and right columns, each dot represents a network to which a select gene belongs. Numerical values are available online ([Methods](#)).

| Trait | Gene (Role)          | $p_{1}^{base}$ | $p_{1}^{near}$ | $p_{1}^{bma}$ | $p_{1}^{net}$ (Network, BF)               | Mouse trait    | Therapeutic/clinical evidence          |
|-------|----------------------|----------------|----------------|---------------|-------------------------------------------|----------------|----------------------------------------|
| BMI   | <i>PAX2</i> (TF)     | 0.78           | 0.80           | 0.94          | 0.94 (Pancreas, $2.07 \times 10^{13}$ )   | Eye, Renal     | FSGS7, PAPRS                           |
|       | <i>FLT3</i> (TG)     | 0.61           | 0.70           | 0.85          | 0.85 (Cerebellum, $8.70 \times 10^{11}$ ) | Growth, Immune | Acute myeloid leukemia                 |
| WAIST | <i>LAMB1</i> (TG)    | 0.97           | 0.97           | 0.98          | 0.98 (Esophagus, $6.78 \times 10^{239}$ ) | Neuron, NS     | Lissencephaly 5                        |
| BC    | <i>KCTD1</i> (TG)    | 0.89           | 0.93           | 0.98          | 0.98 (Heart, $8.08 \times 10^7$ )         | CS             | Scalp-ear-nipple syndrome              |
|       | <i>CASP8</i> (TG)    | 0.71           | 0.72           | 0.94          | 0.94 (Aorta, $8.27 \times 10^8$ )         | Growth, Immune | HCC, <b>Glionitrin A</b>               |
| RA    | <i>AIRE</i> (TF)     | 0.54           | 0.61           | 0.84          | 0.84 (B cell, $3.31 \times 10^{57}$ )     | Immune         | APS1                                   |
| IBD   | <i>LPP</i> (TG)      | 0.98           | 0.94           | 0.99          | 0.99 (Monocyte, $6.28 \times 10^{31}$ )   | Cellular       | Acute myeloid leukemia                 |
|       | <i>FOXP1</i> (TF)    | 0.84           | 0.78           | 0.95          | 0.95 (NK cell, $5.07 \times 10^{35}$ )    | Immune, Neuron | Language impairment                    |
|       | <i>CCND3</i> (TG)    | 0.81           | 0.89           | 0.95          | 0.95 (NK cell, $5.07 \times 10^{35}$ )    | Immune         |                                        |
| HDL   | <i>ALOX5</i> (TG)    | 0.97           | 0.97           | 0.99          | 0.99 (Monocyte, $4.75 \times 10^{15}$ )   | Immune, Metab. | Atherosclerosis                        |
|       | <i>GPAM</i> (TG)     | 0.92           | 0.95           | 0.98          | 0.98 (Liver, $2.81 \times 10^{21}$ )      | Liver, Metab.  |                                        |
|       | <i>NR0B2</i> (TG)    | 0.84           | 0.93           | 0.98          | 0.98 (Liver, $2.81 \times 10^{21}$ )      | Growth, Metab. | Early-onset obesity                    |
| LDL   | <i>CERS2</i> (TG)    | 0.99           | 0.99           | 1.00          | 1.00 (NK cell, $5.18 \times 10^{30}$ )    | Liver, Metab.  |                                        |
|       | <i>ABCA1</i> (TG)    | 0.98           | 0.98           | 0.99          | 0.99 (Liver, $7.66 \times 10^{27}$ )      | Liver, Metab.  | Tangier disease, <b>Probuocol</b>      |
|       | <i>ABCB11</i> (TG)   | 0.68           | 0.72           | 0.88          | 0.88 (Liver, $7.66 \times 10^{27}$ )      | Liver, Metab.  | Cholestasis <b>BRI2</b> , <b>PFI2</b>  |
|       | <i>DLG4</i> (TG)     | 0.69           | 0.59           | 0.85          | 0.85 (NK cell, $5.18 \times 10^{30}$ )    | Metab., NS     | <b>Tat-NR2B9c</b>                      |
|       | <i>SOX17</i> (TF)    | 0.52           | 0.65           | 0.82          | 0.84 (CD8, $5.86 \times 10^{28}$ )        | Liver, Metab.  | Vesicoureteral reflux 3                |
| CAD   | <i>TGFB1</i> (TG)    | 0.92           | 0.99           | 0.99          | 0.99 (Adipose, $1.67 \times 10^{29}$ )    | CS, Growth     | Camurati-Engelmann disease             |
|       | <i>FN1</i> (TG)      | 0.58           | 0.79           | 0.91          | 0.92 (GEJ, $9.78 \times 10^{28}$ )        | CS, Metab.     | GFND2, SMDCF                           |
|       | <i>CDH13</i> (TG)    | 0.31           | 0.55           | 0.77          | 0.82 (Heart, $1.93 \times 10^{28}$ )      | CS, Metab.     |                                        |
|       | <i>EDNRA</i> (TG)    | 0.57           | 0.79           | 0.80          | 0.82 (Aorta, $1.09 \times 10^{27}$ )      | CS, Muscle     | <b>Ambrisentan</b> , <b>Macitentan</b> |
| AF    | <i>SCN5A</i> (TG)    | 0.87           | 0.92           | 1.00          | 1.00 (Heart, $6.89 \times 10^{12}$ )      | CS, Muscle     | Brugada syndrome 1, FAF 10             |
|       | <i>ENPEP</i> (TG)    | 0.50           | 0.76           | 0.92          | 0.94 (Uterus, $2.71 \times 10^{11}$ )     |                | <b>QGC-001</b>                         |
|       | <i>ATXN1</i> (TG)    | 0.45           | 0.62           | 0.90          | 0.90 (Colon, $7.54 \times 10^{14}$ )      | Muscle, NS     | Spinocerebellar ataxia 1               |
| SCZ   | <i>MYOT</i> (TG)     | 0.55           | 0.66           | 0.86          | 0.87 (Muscle, $8.55 \times 10^{14}$ )     |                | Spheroid body myopathy, MFM3           |
|       | <i>FOXP1</i> (TF)    | 1.00           | 1.00           | 1.00          | 1.00 (Colon, $1.20 \times 10^{144}$ )     | Growth, Neuron | Mental retardation                     |
|       | <i>BCL11A</i> (TG)   | 1.00           | 1.00           | 1.00          | 1.00 (Spleen, $1.44 \times 10^{141}$ )    | Immune, NS     | Dias-Logan syndrome                    |
| NEU   | <i>SLC25A12</i> (TG) | 0.79           | 0.81           | 0.88          | 0.88 (Muscle, $4.99 \times 10^{127}$ )    | Neuron, NS     | EIEE39                                 |
|       | <i>TCF4</i> (TF)     | 0.72           | 0.88           | 0.95          | 0.95 (CD8, $3.66 \times 10^{20}$ )        | Immune, NS     | Pitt-Hopkins syndrome                  |
|       | <i>RAPSN</i> (TG)    | 0.77           | 0.88           | 0.93          | 0.93 (Muscle, $8.20 \times 10^{17}$ )     | Muscle, NS     | CMS11                                  |
|       | <i>MEF2C</i> (TF)    | 0.15           | 0.40           | 0.83          | 0.83 (Ileum, $8.56 \times 10^{22}$ )      | Growth, Neuron | Mental retardation 20                  |
|       | <i>SNCA</i> (TG)     | 0.15           | 0.32           | 0.78          | 0.79 (Putamen, $2.12 \times 10^{19}$ )    | Neuron, NS     | DLB, Parkinson 1, 4, <b>BIIB054</b>    |
|       | <i>PAX6</i> (TF)     | 0.10           | 0.22           | 0.62          | 0.64 (Putamen, $2.12 \times 10^{19}$ )    | NS, Vision     | Optic nerve hypoplasia                 |
|       | <i>PCLO</i> (TG)     | 0.06           | 0.17           | 0.63          | 0.63 (Ileum, $8.56 \times 10^{22}$ )      | Growth, NS     | Pontocerebellar hypoplasia 3           |

TABLE 1

Examples of RSS-NET highlighted genes that were not reported in GWAS of the same data ( $p \geq 5 \times 10^{-8}$ ) but were implicated in later GWAS with increased sample sizes ( $p < 5 \times 10^{-8}$ ).

The “mouse trait” column is based on the Mouse Genome Informatics<sup>43</sup>. The “therapeutic/clinical evidence” column is based on the Online Mendelian Inheritance in Man<sup>44</sup> and Therapeutic Target Database<sup>48</sup>. Click [blue links](#) to view details online. Drugs are **highlighted in yellow**. Abbreviations of GWAS traits are defined in [Supplementary Table 2](#). GEJ: gastroesophageal junction; CS: cardiovascular system; DS: digestive/alimentary system; Metab.: metabolism; NS: nervous system.

315 potentially real we exploited 15 analyzed traits that each had an updated  
316 GWAS with larger sample size. In each case we obtained newly mapped  
317 genes from the GWAS Catalog<sup>47</sup> and computed the proportion of these genes  
318 that were identified by RSS-NET ( $P_1^{\text{bma}} \geq 0.9$ ). The overlap proportions re-  
319 mained significant (median: 12%; median Fisher exact  $p = 1.93 \times 10^{-5}$ ; [Sup-](#)  
320 [plementary Table 10](#)), showing the potential of RSS-NET to identify trait-  
321 associated genes that can be validated by later GWAS with additional sam-  
322 ples. Among these validated genes, many are strongly supported by multiple  
323 lines of external evidence. A particular example is *NROB2*, a liver-active<sup>7</sup>  
324 gene prioritized for HDL (BF =  $2.81 \times 10^{21}$ ,  $P_1^{\text{base}} = 0.84$ ,  $P_1^{\text{net}} = 0.98$ ), which  
325 was not identified by standard GWAS<sup>49</sup> of the same data (minimum single-  
326 SNP  $p = 1.4 \times 10^{-7}$  within 100kb,  $n = 99,900$ ). *NROB2* is associated with var-  
327 ious mouse lipid traits<sup>50–52</sup> and human obesity<sup>53</sup>, and was later identified  
328 in a GWAS of HDL<sup>54</sup> with larger sample size ( $p = 9.7 \times 10^{-16}$ ,  $n = 187,056$ ).  
329 [Table 1](#) lists additional examples.

330 **Biological and clinical relevance of prioritized genes.** Despite sig-  
331 nificant overlaps with GWAS-implicated genes, a large fraction of RSS-NET  
332 prioritized genes ( $P_1^{\text{bma}} \geq 0.9$ ) were not identified by GWAS (median: 70%;  
333 [Supplementary Table 10](#)). To systematically assess their relevance, we cross-  
334 referenced these genes with multiple orthogonal databases.

335 Mouse phenomics provides important resources to study genetics of human  
336 traits<sup>55</sup>. Here we evaluated overlap between RSS-NET prioritized genes and  
337 genes implicated in 27 categories of knockout mouse phenotypes<sup>43</sup>. Network-  
338 informed genes ( $P_1^{\text{bma}} \geq 0.9$ ) were significantly enriched in 128 mouse-human  
339 trait pairs (FDR  $\leq 0.1$ ; [Supplementary Table 12](#)). Fewer significant pairs were  
340 identified without network information (119 for  $P_1^{\text{near}} \geq 0.9$ ; 80 for  $P_1^{\text{base}} \geq 0.9$ ).  
341 For many human traits, top enrichments of network-prioritized genes oc-  
342 curred in closely related mouse phenotypes ([Fig. 5e](#)). Schizophrenia-associated  
343 genes were strongly enriched in nervous, neurological and growth phenotypes  
344 (OR: 1.77 – 2.04). Genes prioritized for autoimmune diseases were strongly  
345 enriched in immune and hematopoietic phenotypes (OR: 2.05 – 2.35). The  
346 cardiovascular system showed strong enrichments of genes associated with  
347 heart conditions (OR: 2.45 – 2.92). The biliary system showed strong enrich-  
348 ments of genes associated with lipids, BMI, CAD and T2D (OR: 2.16 – 10.78).  
349 The cross-species phenotypically matched enrichments strengthen the bio-  
350 logical relevance of RSS-NET results.

351 Mendelian disease-causing genes have been recognized as an vital con-  
352 tributor to complex traits<sup>56,57</sup>. Here we quantified overlap between RSS-  
353 NET prioritized genes and genes causing 19 categories<sup>45</sup> of Mendelian disor-



| Trait | Gene (Role)         | $P_1^{\text{base}}$ | $P_1^{\text{near}}$ | $P_1^{\text{bma}}$ | $P_1^{\text{net}}$ (Network, BF)           | Mouse trait     | Therapeutic/clinical evidence                      |
|-------|---------------------|---------------------|---------------------|--------------------|--------------------------------------------|-----------------|----------------------------------------------------|
| BMI   | <i>NEXN</i> (TG)    | 0.71                | 0.79                | 0.89               | 0.90 (Muscle, $9.31 \times 10^{12}$ )      | CS, Muscle      | Cardiomyopathy <b>D1CC</b> , <b>H20</b>            |
|       | <i>CDX2</i> (TF)    | 0.61                | 0.70                | 0.83               | 0.86 (NK cell, $3.95 \times 10^{13}$ )     | DS, Growth      |                                                    |
| WAIST | <i>BSCL2</i> (TG)   | 0.80                | 0.68                | 0.87               | 0.87 (Esophagus, $6.78 \times 10^{239}$ )  | Adipose, Growth | Lipodystrophy <b>CG2</b>                           |
|       | <i>FOXP2</i> (TF)   | 0.56                | 0.59                | 0.73               | 0.73 (Esophagus, $6.78 \times 10^{239}$ )  | Growth, NS      | Speech-language disorder 1                         |
| BC    | <i>ADSL</i> (TG)    | 0.76                | 0.80                | 0.91               | 0.92 (Aorta, $8.27 \times 10^8$ )          | CS, Eye         | Adenylosuccinase deficiency                        |
|       | <i>SYNE1</i> (TG)   | 0.57                | 0.63                | 0.89               | 0.90 (Esophagus, $6.30 \times 10^7$ )      | Growth, Muscle  | AMCM, EDMD4, SCAR8                                 |
| RA    | <i>TAL1</i> (TF)    | 0.71                | 0.79                | 0.91               | 0.93 (CD4, $3.02 \times 10^{52}$ )         | Immune, Tumor   | Acute lymphocytic leukemia                         |
|       | <i>FHIT</i> (TG)    | 0.30                | 0.60                | 0.90               | 0.91 (CD4, $3.02 \times 10^{52}$ )         | Immune, Tumor   |                                                    |
| IBD   | <i>FLT3</i> (TG)    | 0.33                | 0.57                | 0.73               | 0.73 (B cell, $3.31 \times 10^{57}$ )      | Immune, Tumor   | Acute myeloid leukemia                             |
|       | <i>FHIT</i> (TG)    | 0.63                | 0.87                | 0.95               | 0.95 (CD4, $5.32 \times 10^{33}$ )         | Immune, Tumor   |                                                    |
|       | <i>GATA3</i> (TF)   | 0.85                | 0.83                | 0.94               | 0.94 (NK cell, $5.07 \times 10^{35}$ )     | Immune, Renal   | Barakat syndrome                                   |
|       | <i>RORA</i> (TF)    | 0.66                | 0.78                | 0.87               | 0.90 (B cell, $1.49 \times 10^{32}$ )      | Immune, NS      | IDDECA                                             |
|       | <i>NFKB2</i> (TF)   | 0.74                | 0.85                | 0.84               | 0.88 (B cell, $1.49 \times 10^{32}$ )      | Immune          | CVID10, <b>DIMS-0150</b>                           |
|       | <i>LRBA</i> (TG)    | 0.42                | 0.58                | 0.72               | 0.72 (NK cell, $5.07 \times 10^{35}$ )     | Immune          | Immunodeficiency CV8                               |
| HDL   | <i>DOCK2</i> (TG)   | 0.38                | 0.53                | 0.71               | 0.71 (NK cell, $5.07 \times 10^{35}$ )     | Immune          | Immunodeficiency 40                                |
|       | <i>MT1G</i> (TG)    | 0.10                | 0.09                | 0.98               | 0.98 (Liver, $2.81 \times 10^{21}$ )       | CS, Metab.      |                                                    |
|       | <i>RETSAT</i> (TG)  | 0.79                | 0.80                | 0.95               | 0.95 (Liver, $2.81 \times 10^{21}$ )       | Adipose, Metab. |                                                    |
|       | <i>ESR1</i> (TF)    | 0.77                | 0.82                | 0.95               | 0.95 (Liver, $2.81 \times 10^{21}$ )       | CS, Metab.      | Myocardial infarction                              |
|       | <i>HCAR3</i> (TG)   | 0.85                | 0.85                | 0.92               | 0.92 (Monocyte, $4.75 \times 10^{15}$ )    | Metab.          | <b>ARI-3037MO</b>                                  |
|       | <i>TNNC1</i> (TG)   | 0.48                | 0.45                | 0.78               | 0.78 (Liver, $2.81 \times 10^{21}$ )       | CS, Muscle      | <b>CMD1Z</b> , <b>CMH13</b> , <b>Levosimendan</b>  |
| LDL   | <i>RAF1</i> (TG)    | 0.79                | 0.83                | 0.90               | 0.90 (Aorta, $3.71 \times 10^{27}$ )       | CS, Immune      | <b>CMD1NN</b> , <b>Semapimod</b>                   |
|       | <i>APOA1</i> (TG)   | 0.70                | 0.76                | 0.90               | 0.90 (Liver, $7.66 \times 10^{27}$ )       | CS, Metab.      | Amyloidosis, HDL deficiency                        |
|       | <i>ACADVL</i> (TG)  | 0.69                | 0.59                | 0.85               | 0.85 (NK cell, $5.18 \times 10^{30}$ )     | Liver, Metab.   | VLCAD deficiency                                   |
|       | <i>ITGB6</i> (TG)   | 0.75                | 0.99                | 0.99               | 0.99 (Ileum, $4.52 \times 10^{62}$ )       | Immune, Metab.  | <b>AI1H</b>                                        |
| HR    | <i>TKT</i> (TG)     | 0.65                | 0.67                | 0.92               | 0.93 (Aorta, $2.43 \times 10^7$ )          | CS, Growth      | <b>SDDHD</b>                                       |
| CAD   | <i>OSM</i> (TG)     | 0.56                | 0.78                | 0.86               | 0.86 (Aorta, $1.09 \times 10^{27}$ )       | Immune, Metab.  | <b>GSK2330811</b>                                  |
|       | <i>TRIB1</i> (TG)   | 0.43                | 0.68                | 0.85               | 0.85 (Adipose, $1.67 \times 10^{29}$ )     | Adipose, Metab. |                                                    |
| AF    | <i>TAB2</i> (TG)    | 0.19                | 0.43                | 0.61               | 0.61 (CD8, $1.13 \times 10^{25}$ )         | CS              | Congenital heart defects                           |
|       | <i>TPMT</i> (TG)    | 0.88                | 0.93                | 0.99               | 0.99 (Ileum, $4.43 \times 10^{13}$ )       | Metab.          | <b>THPM1</b>                                       |
|       | <i>RUNX1</i> (TF)   | 0.44                | 0.60                | 0.88               | 0.89 (Heart, $2.15 \times 10^{14}$ )       | CS, Immune      | Acute myeloid leukemia, <b>FPDMM</b>               |
|       | <i>CSF3</i> (TG)    | 0.56                | 0.72                | 0.88               | 0.88 (Muscle, $8.55 \times 10^{14}$ )      | Blood, Immune   | <b>Interleukin-3</b>                               |
| LOAD  | <i>CASP2</i> (TG)   | 0.99                | 1.00                | 1.00               | 1.00 (CD8, $8.31 \times 10^{26}$ )         | Cellular, NS    | <b>Caspase-2</b>                                   |
|       | <i>TTR</i> (TG)     | 0.64                | 0.92                | 0.94               | 0.94 (Pancreas, $3.53 \times 10^{20}$ )    | Metab.          | <b>FAP</b> , <b>Inotersen</b> , <b>Patisiran</b>   |
| SCZ   | <i>RORA</i> (TF)    | 1.00                | 1.00                | 1.00               | 1.00 (Cortex, $5.39 \times 10^{128}$ )     | Neuron, NS      | <b>IDDECA</b>                                      |
|       | <i>ERBB4</i> (TG)   | 1.00                | 1.00                | 1.00               | 1.00 (Putamen, $7.22 \times 10^{116}$ )    | Neuron, NS      | <b>ALS19</b>                                       |
|       | <i>NFIB</i> (TF)    | 0.97                | 0.97                | 0.98               | 0.98 (Cortex, $5.39 \times 10^{128}$ )     | NS              | <b>MACID</b>                                       |
|       | <i>GRIK2</i> (TG)   | 0.90                | 0.94                | 0.97               | 0.97 (Cerebellum, $3.15 \times 10^{129}$ ) | Neuron, NS      | <b>Mental retardation 6</b>                        |
|       | <i>SYT1</i> (TG)    | 0.84                | 0.89                | 0.93               | 0.93 (Cerebellum, $3.15 \times 10^{129}$ ) | Neuron, NS      | <b>Baker-Gordon syndrome</b>                       |
|       | <i>ESR1</i> (TF)    | 0.80                | 0.84                | 0.93               | 0.93 (Colon, $1.07 \times 10^{141}$ )      | Neuron, NS      | <b>Migraine</b>                                    |
|       | <i>NTRK2</i> (TG)   | 0.78                | 0.84                | 0.91               | 0.91 (Cerebellum, $3.15 \times 10^{129}$ ) | Neuron, NS      | <b>EIEE58</b>                                      |
|       | <i>LRKK2</i> (TG)   | 0.73                | 0.78                | 0.86               | 0.86 (Monocyte, $5.85 \times 10^{131}$ )   | Neuron, NS      | <b>Parkinson 8</b> , <b>DNL151</b> , <b>DNL201</b> |
|       | <i>C9orf72</i> (TG) | 0.74                | 0.78                | 0.83               | 0.83 (Spleen, $1.44 \times 10^{141}$ )     | Neuron, NS      | <b>FTDALS1</b>                                     |
|       | <i>SNCA</i> (TG)    | 0.60                | 0.66                | 0.74               | 0.74 (Cerebellum, $3.15 \times 10^{129}$ ) | Neuron, NS      | <b>DLB</b> , <b>Parkinson 1</b> , <b>4</b>         |
| NEU   | <i>LMBRD1</i> (TG)  | 0.42                | 0.66                | 0.94               | 0.94 (Ileum, $8.56 \times 10^{22}$ )       | Metab.          | <b>MAHCF</b>                                       |
|       | <i>PRKCQ</i> (TG)   | 0.36                | 0.56                | 0.90               | 0.91 (Spleen, $2.13 \times 10^{19}$ )      | Immune, NS      |                                                    |
|       | <i>ATP1A2</i> (TG)  | 0.33                | 0.39                | 0.76               | 0.78 (Putamen, $2.12 \times 10^{19}$ )     | Neuron, NS      | <b>AHC1</b> , <b>FHM2</b>                          |

TABLE 2

Examples of RSS-NET highlighted genes that have not reached genome-wide significance in the GWAS Catalog<sup>47</sup> ( $p \geq 5 \times 10^{-8}$ ) at the time of analysis. The rest is the same as Table 1.

354 ders<sup>44</sup>. Leveraging regulatory networks ( $P_1^{\text{bma}} \geq 0.9$ ), we observed 47 signifi-  
355 cantly enriched Mendelian-complex trait pairs (FDR  $\leq 0.1$ ; 44 for  $P_1^{\text{near}} \geq 0.9$ ;  
356 31 for  $P_1^{\text{base}} \geq 0.9$ ; [Supplementary Table 13](#)), among which the top-ranked  
357 ones were often phenotypically matched (Fig. 5f). Schizophrenia-associated  
358 genes were strongly enriched in Mendelian development and psychiatric dis-  
359 orders (OR: 2.22 – 2.23). Genes prioritized for atrial fibrillation and heart  
360 rate were strongly enriched in arrhythmia (OR: 7.16 – 8.28). Genes priori-  
361 tized for autoimmune diseases were strongly enriched in monogenic immune  
362 dysregulation (OR: 3.11 – 4.32). Monogenic cardiovascular diseases showed  
363 strong enrichments of genes associated with lipids and heart conditions (OR:  
364 2.69 – 3.70). We also identified pairs where Mendelian and complex traits  
365 seemed unrelated but were indeed linked. Examples included Alzheimer’s  
366 disease with immune dysregulation<sup>40</sup> (OR = 7.32) and breast cancer with in-  
367 sulin disorders<sup>58</sup> (OR = 9.71). The results corroborate that Mendelian and  
368 complex traits are not dichotomous, but rather exist on a continuum.

369 Human genetics has proven valuable in therapeutic development for vali-  
370 dating molecular targets<sup>59</sup> and improving success rates<sup>60</sup>. To evaluate their  
371 potential in drug discovery, we examined whether RSS-NET prioritized genes  
372 are pharmacologically active targets with known clinical indications<sup>48</sup>. We  
373 identified genes with perfectly matched drug indications and GWAS traits.  
374 The most illustrative identical match is *EDNRA*, a gene that is prioritized  
375 for CAD ( $P_1^{\text{base}} = 0.57$ ,  $P_1^{\text{net}} = 0.82$  for aorta network), and is also a successful  
376 target of approved drugs for cardiovascular diseases (Table 1). We identified  
377 genes with closely related drug indications and GWAS traits. For example,  
378 gene *TTR* is prioritized for Alzheimer ( $P_1^{\text{base}} = 0.64$ ,  $P_1^{\text{bma}} = 0.94$ ), and is also  
379 a successful target of approved drugs for amyloidosis (Table 2). For early-  
380 stage development, overlaps between drug indications and GWAS traits may  
381 provide additional genetic confidence. For example, gene *HCAR3* is priori-  
382 tized for HDL ( $P_1^{\text{base}} = 0.85$ ,  $P_1^{\text{bma}} = 0.92$ ), and is also a clinical trial target  
383 for lipid metabolism disorders (Table 2). Other examples include *CASP8* with  
384 cancer, *NFKB2* with IBD, and *DLG4* with stroke (Tables 1-2). We also found  
385 mismatches between drug indications and GWAS traits, which could suggest  
386 drug repurposing opportunities<sup>61</sup>. For example, gene *CSF3* is prioritized for  
387 AF ( $P_1^{\text{base}} = 0.56$ ,  $P_1^{\text{bma}} = 0.88$ ), and is also a successful target of an approved  
388 drug for aplastic anemia (AA). Since *CSF3* is associated with various blood  
389 cell traits in mouse<sup>62</sup> and human<sup>63</sup>, and inflammation plays a role in both  
390 AA and AF etiology<sup>32,64</sup>, it is tempting to assess effects of the approved AA  
391 drug on AF. Overall, further evaluations are required to mechanistically un-  
392 derstand the prioritized therapeutic genes, but the findings could be a useful  
393 basis for future studies.

## 394 DISCUSSION

395 We have presented RSS-NET, a new topology-aware method for integrative  
396 analysis of regulatory networks and GWAS summary data. We have demon-  
397 strated the improvement of RSS-NET over existing methods through a wide  
398 variety of simulations, and illustrated its potential to yield novel insights via  
399 extensive analyses of 38 networks and 18 traits. With multi-omics integra-  
400 tion becoming a routine in modern GWAS, we expect that researchers will  
401 find RSS-NET and its open-sourced software useful.

402 Compared with existing integrative approaches, RSS-NET has several key  
403 strengths. First, unlike many methods that require loci passing a significance  
404 threshold<sup>9,14,65</sup>, RSS-NET uses data from genome-wide common variants.  
405 This potentially allows RSS-NET to identify subtle enrichments even in stud-  
406 ies with few significant hits. Second, RSS-NET models enrichments directly  
407 as increased rates ( $\theta$ ) and sizes ( $\sigma^2$ ) of SNP-level associations, and thus by-  
408 passes the issue of converting SNP-level GWAS summary data to gene-level  
409 data<sup>14,15,21</sup>. Third, RSS-NET inherits from RSS-E<sup>13</sup> an important feature  
410 that inferred enrichments automatically highlight which network genes are  
411 most likely to be trait-associated. This prioritization component, though use-  
412 ful, is missing in current polygenic analyses<sup>10,12,15,19,22</sup>. Fourth, compared  
413 with RSS-E<sup>13</sup>, RSS-NET makes more flexible modeling assumptions, and  
414 thus is more adaptive to unknown genetic and enrichment architectures.

415 RSS-NET provides a new view of complex trait genetics through the lens of  
416 regulatory topology. Complementing previous connectivity analyses<sup>14–16,19,24</sup>,  
417 RSS-NET highlights a consistent pattern where genetic signals of complex  
418 traits often distribute across genome via the regulatory topology. RSS-NET  
419 further leverages topology enrichments to enhance trait-associated gene dis-  
420 covery. The topology awareness of RSS-NET relies on a novel model that de-  
421 composes effect size of a single SNP into effects of multiple (cis or trans)  
422 genes through a regulatory network. Other than similar perspective in a re-  
423 cent theory paper<sup>26</sup>, we are not aware of any published work implementing  
424 and evaluating the topology-aware model in practice.

425 RSS-NET depends critically on the quality of input regulatory networks.  
426 The more accurate networks are, the better performance RSS-NET achieves.  
427 Currently our understanding of regulatory networks remains incomplete,  
428 and most of available networks are algorithmically constructed<sup>14–17</sup>. Artifact  
429 nodes and edges of inferred networks can bias RSS-NET results; however our  
430 simulations confirm the robustness of RSS-NET when input networks are  
431 not severely deviated from ground truth. As more accurate networks become  
432 available, the performance of RSS-NET will be markedly enhanced.

433 Like any method, RSS-NET has several limitations in its current form.  
434 First, despite its prioritization feature, RSS-NET does not attempt to pin-  
435 point associations to single causal variants within prioritized loci. For this  
436 task we recommend using off-the-shelf fine-mapping methods<sup>66</sup>. Second, RSS-  
437 NET analyzes a single network at a time. Since a complex disease typically  
438 manifests in various sites, multiple cellular networks are likely to mediate  
439 disease risk jointly. To extend RSS-NET to incorporate multiple networks,  
440 an intuitive idea would be representing the total effect of a SNP as an av-  
441 erage of its effect size in each network, weighted by network relevance for a  
442 disease. Third, RSS-NET does not leverage known genomic annotations, ei-  
443 ther at the level of SNPs<sup>10,19,22</sup> or genes<sup>11–13</sup>. Although our mis-specification  
444 simulations and near-gene control analyses have confirmed that RSS-NET is  
445 robust to generic enrichments of known features, accounting for known anno-  
446 tations can help interpret observed network enrichments<sup>19</sup>. Our preliminary  
447 experiments, however, showed that incorporating additional networks or an-  
448 notations in RSS-NET increased computation costs. Hence, we view the de-  
449 velopment of more efficient multi-network, multi-annotation methods as an  
450 important direction for future work.

## 451 METHODS

452 **Gene and SNP information.** This study used genes and SNPs from the  
453 human genome assembly GRCh37. This study used 18,334 protein-coding au-  
454 tosomal genes ([http://ftp.ensembl.org/pub/grch37/release-94/gtf/homo\\_](http://ftp.ensembl.org/pub/grch37/release-94/gtf/homo_sapiens)  
455 [sapiens](http://ftp.ensembl.org/pub/grch37/release-94/gtf/homo_sapiens), accessed January 3, 2019). Simulations used 348,965 genome-wide  
456 SNPs<sup>23</sup> (<https://www.wtccc.org.uk>), and data analyses used 1,289,786 genome-  
457 wide HapMap3<sup>25</sup> SNPs ([https://data.broadinstitute.org/alkesgroup/](https://data.broadinstitute.org/alkesgroup/LDSCORE/w_hm3.snplist.bz2)  
458 [LDSCORE/w\\_hm3.snplist.bz2](https://data.broadinstitute.org/alkesgroup/LDSCORE/w_hm3.snplist.bz2), accessed November 27, 2018). This study also  
459 excluded SNPs on sex chromosomes, SNPs with minor allele frequency less  
460 than 1%, and SNPs in the human leukocyte antigen region.

461 **GWAS summary statistics and LD estimates.** The GWAS summary  
462 statistics<sup>49,67–79</sup> ([Supplementary Table 2](#)) and LD estimates<sup>80</sup> used in the  
463 present study were processed in the same way as those in our previous work<sup>13</sup>.  
464 Data download links are provided in [Supplementary Notes](#).

465 **Gene regulatory networks.** We inferred 38 regulatory networks from  
466 paired high-throughput sequencing data of gene expression (e.g., RNA-seq)  
467 and chromatin accessibility (e.g., DNase-seq or ATAC-seq), using a regression-  
468 based method<sup>17</sup>. We first constructed an “omnibus” network from paired data

469 of all available biological samples, and then reorganized this “omnibus” net-  
470 work in light of regulatory elements (REs) identified<sup>81</sup> in each context to  
471 generate context-specific networks for 5 immune cell types, 5 brain regions  
472 and 27 non-brain tissues. The network-construction software is available at  
473 <https://github.com/suwonglab/PECA>. The 38 networks are available at <https://github.com/suwonglab/rss-net>.

474  
475 For simplicity we formulate a regulatory network as a bipartite graph  
476  $\{\mathbf{V}_{\text{TF}}, \mathbf{V}_{\text{TG}}, \mathbf{E}_{\text{TF-TG}}\}$ , where  $\mathbf{V}_{\text{TF}}$  denotes the node set of transcription factors  
477 (TFs),  $\mathbf{V}_{\text{TG}}$  denotes the node set of target genes (TGs), and  $\mathbf{E}_{\text{TF-TG}}$  denotes  
478 the set of directed TF-to-TG edges, summarizing how TFs regulate TGs through  
479 REs (but not vice versa). Each edge has a weight between 0 and 1, measuring  
480 the relative regulation strength of a TF on a TG. Each network file contains a  
481 list of REs, TFs, TGs, TF-to-TG edges and weights. On average each network  
482 has 431 TFs, 3,298 TGs and 93,764 TF-to-TG edges. Additional information  
483 of networks is provided in [Supplementary Notes](#) and [Tables 14-16](#).

484 The sequencing data used for network construction were obtained from  
485 ENCODE<sup>5,82</sup> data portal (<https://www.encodeproject.org>, accessed De-  
486 cember 14, 2018) and GTEx<sup>7</sup> data portal (<https://gtexportal.org>, accessed  
487 July 13, 2019). Details are provided in [Supplementary Table 1](#).

488 **External databases for cross-reference.** To validate and interpret  
489 RSS-NET gene-based results, we used the following external databases (ac-  
490 cessed November 28, 2019): GWAS Catalog<sup>47</sup> (<https://www.ebi.ac.uk/gwas/>),  
491 Mouse Genome Informatics<sup>43</sup> (<http://www.informatics.jax.org/>), phenotype-  
492 specific Mendelian gene sets<sup>45</sup> ([https://github.com/bogdanlab/gene\\_sets/](https://github.com/bogdanlab/gene_sets/)),  
493 Online Mendelian Inheritance in Man<sup>44</sup> (<https://www.omim.org/>), Thera-  
494 peutic Target Database<sup>48</sup> (<http://db.idrblab.net/ttd/>).

495 **Network-induced effect size distribution.** We model the total effect  
496 of SNP  $j$  on a given trait,  $\beta_j$ , as

$$(1) \quad \beta_j \sim \pi_j \cdot \mathcal{N}(\mu_j, \sigma_0^2) + (1 - \pi_j) \cdot \delta_0,$$

497 where  $\pi_j$  denotes the probability that SNP  $j$  is associated with the trait ( $\beta_j \neq$   
498 0),  $\{\mu_j, \sigma_0^2\}$  characterize the center and variability of a trait-associated SNP  
499  $j$ 's effect size, and  $\delta_0$  indicates point mass at zero ( $\beta_j = 0$ ).

500 We model the trait-association probability  $\pi_j$  as

$$(2) \quad \log_{10} \left( \frac{\pi_j}{1 - \pi_j} \right) = \theta_0 + a_j \cdot \theta,$$

501 where  $\theta_0 < 0$  captures the genome-wide background proportion of trait-associated  
502 SNPs,  $\theta > 0$  reflects the increase in probability, on the log10-odds scale, that

503 a SNP inside a network is trait-associated, and  $a_j$  indicates whether SNP  $j$   
 504 is inside a network. Following previous analyses<sup>12,13,19</sup>, we let  $a_j = 1$  if SNP  
 505  $j$  is within 100 kb of any element (TG, RE, or TF) in a given network. The  
 506 idea of (2) is that if a tissue or cell type plays an important role in a trait  
 507 then genetic associations may tend to occur more often in SNPs involved in  
 508 the network of this context than expected by chance.

509 We model the mean effect size  $\mu_j$  as

$$(3) \quad \mu_j = \sum_{g \in \mathbf{O}_j} w_{jg} \cdot \gamma_{jg}$$

510 where  $\mathbf{O}_j$  is the set of all nearby or distal genes contributing to the total  
 511 effect of SNP  $j$ ,  $w_{jg}$  measures the relevance between SNP  $j$  and gene  $g$ , and  
 512  $\gamma_{jg}$  denotes the effect of SNP  $j$  on a trait due to gene  $g$ . In this study we use  
 513 a pre-defined regulatory network to specify  $\{\mathbf{O}_j, w_{jg}\}$ :

$$(4) \quad \mu_j = \underbrace{\sum_{g \in \mathbf{G}_j} c_{jg}}_{\text{cis}} \cdot (\gamma_{jg} + \underbrace{\sum_{t \in \mathbf{T}_g} v_{gt} \cdot \gamma_{jt}}_{\text{trans}}),$$

514 where  $\mathbf{G}_j$  is the set of all genes within 1 Mb cis window of SNP  $j$ ,  $c_{jg}$  mea-  
 515 sures the relative impact of a cis SNP  $j$  on gene  $g$ ,  $\mathbf{T}_g$  is the set of all genes  
 516 that are directly regulated by TF  $g$  in trans in a given network ( $\mathbf{T}_g = \emptyset$  if gene  
 517  $g$  is not a TF), and  $v_{gt}$  measures the relative impact of a TF  $g$  on its target  
 518 gene  $t$ . We use pre-defined network edges and weights<sup>17</sup> to specify the trans  
 519 interconnection  $\mathbf{T}_g$  and impact  $v_{gt}$  respectively. We use context-matching *cis*-  
 520 eQTL data<sup>7,8,83</sup> to specify the cis impact  $c_{jg}$ ; see [Supplementary Notes](#) and  
 521 [Tables 17-18](#) for details. The idea of (3)-(4) is that the true effect of a SNP  
 522 may fan out through some regulatory network of multiple (nearby or distal)  
 523 genes to affect the trait<sup>24,26</sup>.

524 We model the random effect of SNP  $j$  due to gene  $g$ ,  $\gamma_{jg}$ , as

$$(5) \quad \gamma_{jg} \stackrel{\text{i.i.d.}}{\sim} \mathcal{N}(0, \sigma^2),$$

525 where the SNP-level subscript  $j$  in  $\gamma_{jg}$  ensures the exchangeability of  $\beta_j$  in  
 526 (1); see [Supplementary Notes](#). The constant variance  $\sigma^2$  in (5) is chosen for  
 527 computational convenience. (One could potentially improve (5) by letting  $\sigma^2$   
 528 depend on functional annotations<sup>10,22</sup> of SNP  $j$  and/or context-specific ex-  
 529 pression<sup>11-13</sup> of gene  $g$ , though possibly at higher computational cost.)

530 **Bayesian hierarchical modeling.** Consider a GWAS with  $n$  unrelated  
 531 individuals measured on  $p$  SNPs. In practice we do not know the true SNP-  
 532 level effects  $\beta := (\beta_1, \dots, \beta_p)'$  in (1), but we can infer them from GWAS sum-  
 533 mary statistics and LD estimates. Specifically, we perform Bayesian inference

534 for  $\beta$  by combining the network-based effect size prior (1)–(5) with the “Re-  
535 gression with Summary Statistics” (RSS) likelihood<sup>20</sup>:

$$(6) \quad \hat{\beta} \sim \mathcal{N}(\widehat{\mathbf{S}}\widehat{\mathbf{R}}\widehat{\mathbf{S}}^{-1}\beta, \widehat{\mathbf{S}}\widehat{\mathbf{R}}\widehat{\mathbf{S}}),$$

536 where  $\hat{\beta} := (\hat{\beta}_1, \dots, \hat{\beta}_p)'$  is a  $p \times 1$  vector,  $\widehat{\mathbf{S}} := \text{diag}(\widehat{\mathbf{s}})$  is a  $p \times p$  diagonal matrix  
537 with diagonal elements being  $\widehat{\mathbf{s}} := (\hat{s}_1, \dots, \hat{s}_p)'$ ,  $\hat{\beta}_j$  and  $\hat{s}_j$  are estimated single-  
538 SNP effect size of each SNP  $j$  and its standard error from the GWAS, and  
539  $\widehat{\mathbf{R}}$  is the  $p \times p$  LD matrix estimated from an external reference panel with  
540 ancestry matching the GWAS.

541 RSS-NET, defined by the hierarchical model (1)–(6), consists of four un-  
542 known hyper-parameters:  $\{\theta_0, \theta, \sigma_0^2, \sigma^2\}$ . To specify hyper-priors, we first in-  
543 troduce two free parameters  $\{\eta, \rho\} \in [0, 1]$  to re-parameterize  $\{\sigma_0^2, \sigma^2\}$ :

$$(7) \quad \sigma_0^2 = \eta \cdot (1 - \rho) \cdot \left( \sum_{j=1}^p \frac{\pi_j}{n\hat{s}_j^2} \right)^{-1}, \quad \sigma^2 = \eta \cdot \rho \cdot \left( \sum_{j=1}^p \frac{\pi_j \cdot \sum_{g \in \mathbf{O}_j} w_{jg}^2}{n\hat{s}_j^2} \right)^{-1},$$

544 where, roughly,  $\eta$  represents the proportion of the total phenotypic variation  
545 explained by  $p$  SNPs, and  $\rho$  represents the proportion of total genetic varia-  
546 tion explained by network annotations  $\{\mathbf{O}_j, w_{jg}\}$ . Because  $n\hat{s}_j^2$  is roughly the  
547 ratio of phenotype variance to genotype variance, (7) ensures that genetic ef-  
548 fect sizes ( $\beta$ ) do not rely on sample size  $n$ , and have the same measurement  
549 unit as the trait. See [Supplementary Notes](#) for the derivation of (7). We then  
550 place independent uniform grid priors on  $\{\theta_0, \theta, \eta, \rho\}$  ([Supplementary Table](#)  
551 [19](#)). We verify that RSS-NET results are robust to grid choice ([Supplementary](#)  
552 [Fig. 8](#)). (If one had specific information about  $\{\theta_0, \theta, \eta, \rho\}$  in a given setting  
553 then this could be incorporated here.)

554 **Network enrichment.** To assess whether a regulatory network is en-  
555 riched for genetic associations with a trait, we evaluate a Bayes factor (BF):

$$(8) \quad \text{BF} = \frac{p(\hat{\beta} \mid \widehat{\mathbf{S}}, \widehat{\mathbf{R}}, \mathbf{a}, \mathbf{O}, \mathbf{W}, M_1)}{p(\hat{\beta} \mid \widehat{\mathbf{S}}, \widehat{\mathbf{R}}, \mathbf{a}, \mathbf{O}, \mathbf{W}, M_0)},$$

556 where  $p(\cdot)$  denotes probability densities,  $\mathbf{a}$  is defined in (2),  $\{\mathbf{O}, \mathbf{W}\}$  are defined  
557 in (3),  $M_1$  denotes the enrichment model where  $\theta > 0$  or  $\sigma^2 > 0$ , and  $M_0$  de-  
558 notes the baseline model where  $\theta = 0$  and  $\sigma^2 = 0$ . The observed data are BF  
559 times more likely under  $M_1$  than under  $M_0$ , and so the larger the BF, the  
560 stronger evidence for network enrichment. See [Supplementary Notes](#) for de-  
561 tails of computing BF. To compute BFs used in [Figure 5b](#), we replace  $M_1$  in (8)  
562 with three restricted enrichment models ( $M_{11}, M_{12}, M_{13}$ ). Unless otherwise  
563 specified, all BFs reported in this work are based on  $M_1$ .

564 **Locus association.** To identify association between a locus and a trait,  
565 we compute  $P_1$ , the posterior probability that at least one SNP in the locus is  
566 associated with the trait:

$$(9) \quad P_1 = 1 - \Pr(\beta_j = 0, \forall j \in \text{locus} \mid \mathbf{D}, \text{model}),$$

567 where  $\mathbf{D}$  is a shorthand for the input data of RSS-NET including GWAS sum-  
568 mmary statistics  $\{\hat{\beta}, \hat{\mathbf{S}}\}$ , LD estimates  $\hat{\mathbf{R}}$  and network annotations  $\{\mathbf{a}, \mathbf{O}, \mathbf{W}\}$ . See  
569 [Supplementary Notes](#) for details of computing  $P_1$ . For a locus,  $P_1^{\text{base}}$ ,  $P_1^{\text{near}}$   
570 and  $P_1^{\text{net}}$  correspond to  $P_1$  evaluated under the baseline model  $M_0$ , the en-  
571 richment model  $M_1$  for the near-gene control network with all genes as nodes  
572 and no edges, and  $M_1$  for a given network. In this study a locus is defined as  
573 the transcribed region of a gene plus 100 kb upstream and downstream.

574 For  $K$  networks with enrichments stronger than the near-gene control, we  
575 use Bayesian model averaging (BMA) to compute  $P_1^{\text{bma}}$  for each locus:

$$(10) \quad P_1^{\text{bma}} = \frac{\sum_{k=1}^K P_1^{\text{net}}(k) \cdot \text{BF}(k)}{\sum_{k=1}^K \text{BF}(k)},$$

576 where  $P_1^{\text{net}}(k)$  and  $\text{BF}(k)$  are enrichment  $P_1$  and BF for network  $k = 1, \dots, K$ .  
577 The ability to average across models in (10) is an advantage the Bayesian  
578 approach, because it allows us to assess associations in light of the network  
579 enrichment without having to select a single enrichment model.

580 **Computation time.** The total computational time of RSS-NET to ana-  
581 lyze a pair of trait and network is determined by the number of SNPs ana-  
582 lyzed, the size of hyper-parameter grid, and the number of variational itera-  
583 tions till convergence, all of which can vary considerably among studies. It is  
584 thus hard to make general statements about computational time. However,  
585 to give a specific example, we finished the analysis of 1.1 million HapMap3  
586 SNPs and liver network for HDL within 12 hours in a standard computer  
587 cluster (60 nodes, 8 CPUs and 32 Gb memory per node).

588 **Simulation overview.** Using genotypes of 348,965 genome-wide autosomal  
589 SNPs from 1,458 individuals<sup>23</sup>, we simulated enrichment datasets under  
590  $M_1$  for the B cell regulatory network<sup>5,17,82</sup> (Fig.s 2-4; [Supplementary Fig.s 1-6](#)),  
591 and simulated baseline datasets in the following scenarios: (1)  $M_0$  (Figs. 2,  
592 4; [Supplementary Fig.s 1, 5, 6](#)); (2) random near-gene SNPs were enriched for  
593 associations (Fig 3a; [Supplementary Fig. 2](#)); (3) random near-RE SNPs were  
594 enriched for associations (Fig 3b; [Supplementary Fig. 3](#)); (4) edge-altered  
595 B cell networks were enriched for associations (Fig 3c; [Supplementary Fig.](#)



596 4). We matched enrichment and baseline datasets by the number of trait-  
597 associated SNPs and the proportion of phenotypic variation explained by all  
598 SNPs. On the simulated datasets we assessed enrichments of the B cell net-  
599 work (Figs 2-3; Supplementary Figs 1-4) and tested gene-based associations  
600 (Fig. 4; Supplementary Fig. 5). The only exception is the noisy network sim-  
601 ulations (Supplementary Fig. 6) where we analyzed random subsets of the B  
602 cell network. Simulation details are provided in Supplementary Figures 1-6.

603 This study used the following software packages in simulations: RSS-E  
604 (<https://github.com/stephenslab/rss>, accessed October 19, 2018), Pas-  
605 cal (<https://www2.unil.ch/cbg/index.php?title=Pascal>, accessed Octo-  
606 ber 5, 2017) and LDSC (version 1.0.0, <https://github.com/bulik/ldsc>, ac-  
607 cessed November 27, 2018). See Supplementary Notes for details.

608 **Code availability.** The RSS-NET software is available at <https://github.com/suwonglab/rss-net>. Tutorials of installing and using RSS-NET are pro-  
609 vided in <https://suwonglab.github.io/rss-net>. Results of this study were  
610 generated from MATLAB version 9.3.0.713579 (R2017b), on a Linux system  
611 with Intel E5-2650V2 2.6 GHz and E5-2640V4 2.4 GHz processors. All other  
612 codes are specified in Methods and Supplementary Notes.

614 **Data availability.** Network files used in this study are available at <https://github.com/suwonglab/rss-net>. Analysis results of this study are avail-  
615 able at <https://xiangzhu.github.io/rss-peca>. All other data are speci-  
616 fied in Methods and Supplementary Notes.

618 **Author contributions.** X.Z. and W.H.W. conceived the study. X.Z. devel-  
619 oped the methods and implemented the software. X.Z. conducted the simula-  
620 tion experiments. Z.D. provided the 38 regulatory networks. X.Z. performed  
621 the data analyses. X.Z. prepared the supplementary materials and online re-  
622 sources. X.Z. wrote the manuscript. X.Z. and W.H.W. revised the manuscript.

623 **Acknowledgments.** This study is supported by Stein Fellowship to X.Z.  
624 and NIH grants P50HG007735 and R01HG010359 to W.H.W. This study uses  
625 data generated by the Wellcome Trust Case Control Consortium, 1000 Genomes  
626 Project, ENCODE Consortium, GTEx Project, DICE Project, eQTLGen Con-  
627 sortium, and multiple GWAS consortia. We thank them for making their data  
628 publicly available. Detailed acknowledgments are in Supplementary Notes.

## 629 References.

630 [1] Visscher, P. M. *et al.* 10 years of GWAS discovery: biology, function, and translation. *The*  
631 *American Journal of Human Genetics* **101**, 5–22 (2017).

- 632 [2] Tam, V. *et al.* Benefits and limitations of genome-wide association studies. *Nature Re-*  
633 *views Genetics* **20**, 467–484 (2019).
- 634 [3] Manolio, T. *et al.* Finding the missing heritability of complex diseases. *Nature* **461**,  
635 747–753 (2009).
- 636 [4] Hindorf, L. A. *et al.* Potential etiologic and functional implications of genome-wide as-  
637 sociation loci for human diseases and traits. *Proceedings of the National Academy of*  
638 *Sciences* **106**, 9362–9367 (2009).
- 639 [5] ENCODE Project Consortium. An integrated encyclopedia of DNA elements in the hu-  
640 man genome. *Nature* **489**, 57–74 (2012).
- 641 [6] Kundaje, A. *et al.* Integrative analysis of 111 reference human epigenomes. *Nature* **518**,  
642 317–330 (2015).
- 643 [7] GTEx Consortium. Genetic effects on gene expression across human tissues. *Nature*  
644 **550**, 204–213 (2017).
- 645 [8] Schmiedel, B. J. *et al.* Impact of genetic polymorphisms on human immune cell gene  
646 expression. *Cell* **175**, 1701–1715 (2018).
- 647 [9] Trynka, G. *et al.* Chromatin marks identify critical cell types for fine mapping complex  
648 trait variants. *Nature Genetics* **45**, 124–130 (2013).
- 649 [10] Finucane, H. K. *et al.* Partitioning heritability by functional annotation using genome-  
650 wide association summary statistics. *Nature Genetics* **47**, 1228–1235 (2015).
- 651 [11] Calderon, D. *et al.* Inferring relevant cell types for complex traits by using single-cell  
652 gene expression. *American Journal of Human Genetics* **101**, 686–699 (2017).
- 653 [12] Finucane, H. K. *et al.* Heritability enrichment of specifically expressed genes identifies  
654 disease-relevant tissues and cell types. *Nature Genetics* **50**, 621–629 (2018).
- 655 [13] Zhu, X. & Stephens, M. Large-scale genome-wide enrichment analyses identify new  
656 trait-associated genes and pathways across 31 human phenotypes. *Nature Communica-*  
657 *tions* **9**, 4361 (2018).
- 658 [14] Greene, C. S. *et al.* Understanding multicellular function and disease with human tissue-  
659 specific networks. *Nature Genetics* **47**, 569–576 (2015).
- 660 [15] Marbach, D. *et al.* Tissue-specific regulatory circuits reveal variable modular perturba-  
661 tions across complex diseases. *Nature Methods* **13**, 366–370 (2016).
- 662 [16] Sonawane, A. R. *et al.* Understanding tissue-specific gene regulation. *Cell Reports* **21**,  
663 1077–1088 (2017).
- 664 [17] Duren, Z., Chen, X., Jiang, R., Wang, Y. & Wong, W. H. Modeling gene regulation from  
665 paired expression and chromatin accessibility data. *Proceedings of the National Academy*  
666 *of Sciences* **114**, E4914–E4923 (2017).
- 667 [18] Califano, A., Butte, A. J., Friend, S., Ideker, T. & Schadt, E. Leveraging models of cell  
668 regulation and GWAS data in integrative network-based association studies. *Nature*  
669 *Genetics* **44**, 841–847 (2012).
- 670 [19] Kim, S. S. *et al.* Genes with high network connectivity are enriched for disease heritabil-  
671 ity. *American Journal of Human Genetics* **104**, 896–913 (2019).
- 672 [20] Zhu, X. & Stephens, M. Bayesian large-scale multiple regression with summary statis-  
673 tics from genome-wide association studies. *Annals of Applied Statistics* **11**, 1561–1592  
674 (2017).
- 675 [21] Lamparter, D., Marbach, D., Rueedi, R., Kutalik, Z. & Bergmann, S. Fast and rigorous  
676 computation of gene and pathway scores from SNP-based summary statistics. *PLoS*  
677 *Computational Biology* **12**, e1004714 (2016).
- 678 [22] Gazal, S. *et al.* Linkage disequilibrium-dependent architecture of human complex traits  
679 shows action of negative selection. *Nature Genetics* **49**, 1421–1427 (2017).
- 680 [23] Wellcome Trust Case Control Consortium. Genome-wide association study of 14,000  
681 cases of seven common diseases and 3,000 shared controls. *Nature* **447**, 661–678 (2007).

- 682 [24] Boyle, E. A., Li, Y. I. & Pritchard, J. K. An expanded view of complex traits: from poly-  
683 genic to omnigenic. *Cell* **169**, 1177–1186 (2017).
- 684 [25] International HapMap 3 Consortium. Integrating common and rare genetic variation in  
685 diverse human populations. *Nature* **467**, 52–58 (2010).
- 686 [26] Liu, X., Li, Y. I. & Pritchard, J. K. Trans effects on gene expression can drive omnigenic  
687 inheritance. *Cell* **177**, 1022–1034 (2019).
- 688 [27] Lee, B.-C. *et al.* Adipose natural killer cells regulate adipose tissue macrophages to  
689 promote insulin resistance in obesity. *Cell Metabolism* **23**, 685–698 (2016).
- 690 [28] Hotamisligil, G. S. Inflammation, metaflammation and immunometabolic disorders. *Na-  
691 ture* **542**, 177–185 (2017).
- 692 [29] Oikonomou, E. K. & Antoniadou, C. The role of adipose tissue in cardiovascular health  
693 and disease. *Nature Reviews Cardiology* **16**, 83–99 (2019).
- 694 [30] Kang, J. & Rivest, S. Lipid metabolism and neuroinflammation in Alzheimer’s disease:  
695 a role for liver X receptors. *Endocrine Reviews* **33**, 715–746 (2012).
- 696 [31] Shahid, F., Lip, G. Y. & Shantsila, E. Role of monocytes in heart failure and atrial fibril-  
697 lation. *Journal of the American Heart Association* **7**, e007849 (2018).
- 698 [32] Aviles, R. J. *et al.* Inflammation as a risk factor for atrial fibrillation. *Circulation* **108**,  
699 3006–3010 (2003).
- 700 [33] Cotsapas, C. *et al.* Pervasive sharing of genetic effects in autoimmune disease. *PLoS  
701 Genetics* **7**, e1002254 (2011).
- 702 [34] Lo, M. *et al.* Genome-wide analyses for personality traits identify six genomic loci and  
703 show correlations with psychiatric disorders. *Nature Genetics* **49**, 152–156 (2017).
- 704 [35] Ferrari, R. & Fox, K. Heart rate reduction in coronary artery disease and heart failure.  
705 *Nature Reviews Cardiology* **13**, 493–501 (2016).
- 706 [36] Dale, C. E. *et al.* Causal associations of adiposity and body fat distribution with coronary  
707 heart disease, stroke subtypes, and type 2 diabetes mellitus: a Mendelian randomization  
708 analysis. *Circulation* **135**, 2373–2388 (2017).
- 709 [37] Odutayo, A. *et al.* Atrial fibrillation and risks of cardiovascular disease, renal disease,  
710 and death: systematic review and meta-analysis. *BMJ* **354**, i4482 (2016).
- 711 [38] Nelson, C. P. *et al.* Genetically determined height and coronary artery disease. *New  
712 England Journal of Medicine* **372**, 1608–1618 (2015).
- 713 [39] Di, G. P. & Kim, T. Linking lipids to Alzheimer’s disease: cholesterol and beyond. *Nature  
714 Reviews Neuroscience* **12**, 284–296 (2011).
- 715 [40] Heppner, F., Ransohoff, R. & Becher, B. Immune attack: the role of inflammation in  
716 Alzheimer disease. *Nature Reviews Neuroscience* **16**, 358–372 (2015).
- 717 [41] Pickrell, J. *et al.* Detection and interpretation of shared genetic influences on 42 human  
718 traits. *Nature Genetics* **48**, 709–717 (2016).
- 719 [42] Bulik-Sullivan, B. *et al.* An atlas of genetic correlations across human diseases and  
720 traits. *Nature Genetics* **47**, 1236–1241 (2015).
- 721 [43] Bult, C. *et al.* Mouse Genome Database (MGD) 2019. *Nucleic Acids Research* **47**, D801–  
722 D806 (2019).
- 723 [44] Amberger, J., Bocchini, C., Scott, A. & Hamosh, A. OMIM.org: leveraging knowledge  
724 across phenotype-gene relationships. *Nucleic Acids Research* **47**, D1038–D1043 (2019).
- 725 [45] Freund, M. K. *et al.* Phenotype-specific enrichment of Mendelian disorder genes near  
726 GWAS regions across 62 complex traits. *The American Journal of Human Genetics* **103**,  
727 535–552 (2018).
- 728 [46] Noordam, R. *et al.* Multi-ancestry sleep-by-SNP interaction analysis in 126,926 indi-  
729 viduals reveals lipid loci stratified by sleep duration. *Nature Communications* **10**, 1–13  
730 (2019).
- 731 [47] Buniello, A. *et al.* The NHGRI-EBI GWAS Catalog of published genome-wide associa-

- 732 tion studies, targeted arrays and summary statistics 2019. *Nucleic Acids Research* **47**,  
733 D1005–D1012 (2019).
- 734 [48] Wang, Y. *et al.* Therapeutic target database 2020: enriched resource for facilitating  
735 research and early development of targeted therapeutics. *Nucleic acids research* **48**,  
736 D1031–D1041 (2020).
- 737 [49] Teslovich, T. M. *et al.* Biological, clinical and population relevance of 95 loci for blood  
738 lipids. *Nature* **466**, 707–713 (2010).
- 739 [50] Kerr, T. A. *et al.* Loss of nuclear receptor SHP impairs but does not eliminate negative  
740 feedback regulation of bile acid synthesis. *Developmental Cell* **2**, 713–720 (2002).
- 741 [51] Wang, L. *et al.* Redundant pathways for negative feedback regulation of bile acid pro-  
742 duction. *Developmental Cell* **2**, 721–731 (2002).
- 743 [52] Hartman, H. B., Lai, K. & Evans, M. J. Loss of small heterodimer partner expression in  
744 the liver protects against dyslipidemia. *Journal of Lipid Research* **50**, 193–203 (2009).
- 745 [53] Nishigori, H. *et al.* Mutations in the small heterodimer partner gene are associated with  
746 mild obesity in Japanese subjects. *Proceedings of the National Academy of Sciences* **98**,  
747 575–580 (2001).
- 748 [54] Willer, C. *et al.* Discovery and refinement of loci associated with lipid levels. *Nature*  
749 *Genetics* **45**, 1274–1283 (2013).
- 750 [55] Brown, S. *et al.* High-throughput mouse phenomics for characterizing mammalian gene  
751 function. *Nature Reviews Genetics* **19**, 357–370 (2018).
- 752 [56] Lupski, J., Belmont, J., Boerwinkle, E. & Gibbs, R. Clan genomics and the complex  
753 architecture of human disease. *Cell* **147**, 32–43 (2011).
- 754 [57] Blair, D. R. *et al.* A nondegenerate code of deleterious variants in mendelian loci con-  
755 tributes to complex disease risk. *Cell* **155**, 70–80 (2013).
- 756 [58] Bruning, P. F. *et al.* Insulin resistance and breast-cancer risk. *International Journal of*  
757 *Cancer* **52**, 511–516 (1992).
- 758 [59] Plenge, R., Scolnick, E. & Altshuler, D. Validating therapeutic targets through human  
759 genetics. *Nature Reviews Drug Discovery* **12**, 581–594 (2013).
- 760 [60] Nelson, M. *et al.* The support of human genetic evidence for approved drug indications.  
761 *Nature Genetics* **47**, 856–860 (2015).
- 762 [61] Sanseau, P. *et al.* Use of genome-wide association studies for drug repositioning. *Nature*  
763 *Biotechnology* **30**, 317–320 (2012).
- 764 [62] Lieschke, G. *et al.* Mice lacking granulocyte colony-stimulating factor have chronic  
765 neutropenia, granulocyte and macrophage progenitor cell deficiency, and impaired neu-  
766 trophil mobilization. *Blood* **84**, 1737–1746 (1994).
- 767 [63] Astle, W. J. *et al.* The allelic landscape of human blood cell trait variation and links to  
768 common complex disease. *Cell* **167**, 1415–1429 (2016).
- 769 [64] Barrett, A. & Sloand, E. Autoimmune mechanisms in the pathophysiology of myelodys-  
770 plastic syndromes and their clinical relevance. *Haematologica* **94**, 449–451 (2009).
- 771 [65] Wang, Q. *et al.* A Bayesian framework that integrates multi-omics data and gene net-  
772 works predicts risk genes from schizophrenia GWAS data. *Nature Neuroscience* **22**, 691–  
773 699 (2019).
- 774 [66] Schaid, D., Chen, W. & Larson, N. From genome-wide associations to candidate causal  
775 variants by statistical fine-mapping. *Nature Reviews Genetics* **19**, 491–504 (2018).
- 776 [67] Christophersen, I. E. *et al.* Large-scale analyses of common and rare variants identify  
777 12 new loci associated with atrial fibrillation. *Nature Genetics* **49**, 946–952 (2017).
- 778 [68] Michailidou, K. *et al.* Large-scale genotyping identifies 41 new loci associated with breast  
779 cancer risk. *Nature Genetics* **45**, 353–61 (2013).
- 780 [69] Locke, A. E. *et al.* Genetic studies of body mass index yield new insights for obesity  
781 biology. *Nature* **515**, 197–206 (2015).

- 782 [70] Nikpay, M. *et al.* A comprehensive 1000 genomes–based genome-wide association meta-  
783 analysis of coronary artery disease. *Nature Genetics* **47**, 1121–1130 (2015).
- 784 [71] Wood, A. R. *et al.* Defining the role of common variation in the genomic and biological  
785 architecture of adult human height. *Nature Genetics* **46**, 1173–1186 (2014).
- 786 [72] Den Hoed, M. *et al.* Identification of heart rate-associated loci and their effects on cardiac  
787 conduction and rhythm disorders. *Nature Genetics* **45**, 621–631 (2013).
- 788 [73] Liu, J. *et al.* Association analyses identify 38 susceptibility loci for inflammatory bowel  
789 disease and highlight shared genetic risk across populations. *Nature Genetics* **47**, 979–  
790 986 (2015).
- 791 [74] Lambert, J.-C. *et al.* Meta-analysis of 74,046 individuals identifies 11 new susceptibility  
792 loci for Alzheimer’s disease. *Nature Genetics* **45**, 1452–1458 (2013).
- 793 [75] Okbay, A. *et al.* Genetic variants associated with subjective well-being, depressive symp-  
794 toms, and neuroticism identified through genome-wide analyses. *Nature Genetics* **48**,  
795 624–633 (2016).
- 796 [76] Okada, Y. *et al.* Genetics of rheumatoid arthritis contributes to biology and drug discov-  
797 ery. *Nature* **506**, 376–381 (2014).
- 798 [77] Ripke, S. *et al.* Biological insights from 108 schizophrenia-associated genetic loci. *Nature*  
799 **511**, 421–427 (2014).
- 800 [78] Morris, A. P. *et al.* Large-scale association analysis provides insights into the genetic  
801 architecture and pathophysiology of type 2 diabetes. *Nature Genetics* **44**, 981–990 (2012).
- 802 [79] Shungin, D. *et al.* New genetic loci link adipose and insulin biology to body fat distribu-  
803 tion. *Nature* **518**, 187–196 (2015).
- 804 [80] 1000 Genomes Project Consortium. A global reference for human genetic variation. *Na-  
805 ture* **526**, 68–74 (2015).
- 806 [81] Zhang, Y. *et al.* Model-based analysis of ChIP-Seq (MACS). *Genome Biology* **9**, R137  
807 (2008).
- 808 [82] Luo, Y. *et al.* New developments on the Encyclopedia of DNA Elements (ENCODE) data  
809 portal. *Nucleic Acids Research* **48**, D882–D889 (2020).
- 810 [83] Vösa, U. *et al.* Unraveling the polygenic architecture of complex traits using blood eQTL  
811 meta-analysis. *bioRxiv* 447367 (2018).

812 XIANG ZHU  
DEPARTMENT OF STATISTICS  
STANFORD UNIVERSITY  
390 JANE STANFORD WAY  
STANFORD, CA 94305  
USA

ZHANA DUREN AND WING HUNG WONG  
DEPARTMENT OF STATISTICS  
STANFORD UNIVERSITY  
390 JANE STANFORD WAY  
STANFORD, CA 94305  
USA  
AND  
DEPARTMENT OF BIOMEDICAL DATA SCIENCE  
STANFORD UNIVERSITY  
1265 WELCH ROAD  
STANFORD, CA 94305  
USA
